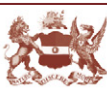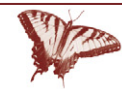

# Revised systematics of Palaeozoic ‘horseshoe crabs’ and the myth of monophyletic Xiphosura

JAMES C. LAMSDELL\*

Department of Geology and Paleontological Institute, University of Kansas, 1475 Jayhawk Boulevard, Lawrence, KS 66045, USA

Received 28 May 2012; revised 18 September 2012; accepted for publication 19 September 2012

The monophyly of the class Xiphosura is critically re-examined. For the first time a phylogenetic analysis of a number of synziphosurine and xiphosurid taxa is performed together with representatives of the other chelicerate orders also included as ingroup taxa. Xiphosura as currently defined is shown to be paraphyletic, and a revised classification is presented. Previous characteristics used to unite the xiphosurids (possessing a fused thoracetrone) and a paraphyletic grade of synziphosurines (retaining freely articulating opisthosomal tergites) include the presence of a cardiac lobe, ophthalmic ridges, an axial region of the opisthosoma, and a reduced first opisthosomal segment. All of these characteristics are, however, here shown to be present in other chelicerate groups, leaving Xiphosura without any defining synapomorphies. A number of other characters, including the form of the chelicerae and appendage VII, indicate that xiphosurans may be paraphyletic with respect to a clade consisting of chasmataspids, eurypterids, and arachnids. What ramifications this has for the evolution of basal chelicerates is briefly discussed, and it is recognized that most of the currently known ‘synziphosurine’ taxa represent offshoots from the main chelicerate lineage with ghost ranges extending into at least the Middle Ordovician.

© 2012 The Linnean Society of London, *Zoological Journal of the Linnean Society*, 2013, **167**, 1–27.  
doi: 10.1111/j.1096-3642.2012.00874.x

ADDITIONAL KEYWORDS: Dekatriata – Euchelicerata – ghost ranges – paraphyly – phylogenetics – Prosomapoda – synziphosurines – tagmosis – Xiphosura – Xiphosurida.

## INTRODUCTION

Few organisms alive today evoke an awareness of the primeval as does the horseshoe crab. Often only seen when shuffling awkwardly onto land to reproduce, yet surprisingly graceful when observed within their usual marine habitat, horseshoe crabs are striking in both their apparent dissimilarity from any of the four familiar extant arthropod groups and their sheer size. Large size among arthropods is something often evoked as a relic of the distant past, from an age when giant arthropods ruled the Carboniferous, and with a maximum length of just over half a metre horseshoe crabs certainly appear to be remnants of grander times. The four surviving species of the class

Xiphosura are actually descendants of more diminutive ancestors however, with no currently known fossil species approaching the size of Recent xiphosurans until possible representatives of the extant genus *Tachypleus* Leach, 1819 appear in the Middle Triassic (Diedrich, 2011). Xiphosurans have existed for some 480 Myr, with the earliest unequivocal representatives found from the Lower Ordovician of Morocco (Van Roy *et al.*, 2010). As a group they appear to have had a relatively low species diversity since the late Palaeozoic, although during the Silurian and Devonian there were a plethora of distinct morphologies (see Størmer, 1955). It has been suggested that the post-Palaeozoic limuloids represent a good example of bradytely (Fisher, 1984). Their apparent morphological conservatism has resulted in their being branded as ‘living fossils’, a term which has been rightly criticized as both inaccurate and misleading (Schopf, 1984).

\*E-mail: lamsdell@ku.edu

Once considered to be relatives of crustaceans, these creatures have an important place in the history of arthropod research, with the formalization that xiphosurans are chelicerates by Lankester (1881) setting the foundations for the modern interpretation of arthropod relationships. Xiphosurans are now considered to be relatively basal euchelicerates (Dunlop, 2010) with a distinction between those species in which the opisthosoma has become fused into a thoracetron (Xiphosurida) and those that retain freely articulating opisthosomal tergites ('synziphosurines'), both originally considered monophyletic suborders (Zittel, 1885). A number of other groups have also in the past been considered members of the Xiphosura, namely aglaspids, chasmataspidids, strabopids, and paleomerids. Aglaspids (see Raasch, 1939) were included by Størmer (1944) but removed when they were shown not to possess chelicerae (Briggs, Bruton & Whittington, 1979), while chasmataspidids were initially described as aberrant xiphosurans (Caster & Brooks, 1956) and, although they were suggested to have closer affinities to eurypterids by Eldredge (1974), were still retained within Xiphosura until finally being excluded by Anderson & Selden (1997). Strabopids (Beecher, 1901) and paleomerids (Størmer, 1956), shown to be synonyms by Tetlie & Moore (2004), were also originally assigned to Xiphosura by Størmer (1944) as part of an aglaspid complex, but these were excluded by Bergström (1971). One other problematic taxon, *Lemoneites* Flower, 1969, was originally considered an aglaspid before being assigned to Xiphosura *incertae sedis* by Eldredge (1974) and finally excluded from Xiphosura by Anderson & Selden (1997), eventually to be revealed as a glyptocystitid echinoderm (Moore & Braddy, 2005). Xiphosura therefore at present encompasses solely Xiphosurida and the synziphosurines.

The monophyly of Xiphosura (xiphosurids plus synziphosurines) has not been questioned since synziphosurines were united with xiphosurids by Zittel (1885); although Packard (1886) follows Woodward (1867) in suggesting that synziphosurines showed closer affinities to eurypterids, it is clear that by the turn of the 20th century Zittel's classification had been universally adopted (e.g. Laurie, 1893; Clarke & Ruedemann, 1912; Woodward, 1913). Originally united primarily through general similarity rather than specific synapomorphies, Xiphosura represents a hang-up of pre-phylogenetic thinking that has carried through into early analyses of chelicerate relationships. Supposed synapomorphies were coded as such based solely on their apparent uniqueness, with no attempt to test for homologous structures in non-xiphosuran arthropods. It is important that the characters used to define monophyletic groups are critically evaluated without an a priori bias for or

against monophyly, as has been done for trilobites (Ramsköld & Edgecombe, 1991). Assumptions derived from historical classification still influence modern studies, and until such assumptions are critically evaluated the validity of groups based upon them is questionable. The only non-xiphosuran taxa included in previous phylogenetic analyses of Xiphosura was an outgroup (Anderson & Selden, 1997), or the entire group was represented by a single taxon in higher level analyses of the Arthropoda (Briggs & Fortey, 1989; Briggs, Fortey & Wills, 1992; Dunlop & Braddy, 2001; Cotton & Braddy, 2004; Hendricks & Lieberman, 2008). A monophyletic Xiphosura was recovered in the analyses of Dunlop & Selden (1997) and Shultz (2007), but Shultz used Xiphosura as his outgroup and so essentially forced their monophyly. Notably, Wills *et al.* (1998) included a synziphosurine (*Weinbergina* Richter & Richter, 1929) and a xiphosurid (*Tachypleus*) in their analysis and retrieved a paraphyletic Xiphosura, an intriguing result.

Furthermore, in the only comprehensive cladistic treatment of Xiphosura to date synziphosurines were shown to not represent a natural group, instead forming a paraphyletic grade that was interpreted as being the stem lineage to Xiphosurida (Anderson & Selden, 1997). At the time the oldest xiphosurid was known from the Carboniferous with synziphosurines known from the Silurian to Devonian, with the expected stratigraphic distribution from stem lineage to crown group. This congruence between stratigraphic and phylogenetic sequence was upset, however, by the discovery of an unequivocal xiphosurid from the Upper Ordovician of Manitoba, Canada (Rudkin, Young & Nowlan, 2008), followed by further xiphosurid reports from the Lower Ordovician of Morocco (Van Roy *et al.*, 2010). The stratigraphic range of the synziphosurines has also been expanded, with the youngest representative now known from the Carboniferous (Moore, McKenzie & Lieberman, 2007) while the oldest occurs in strata slightly younger than that of the undescribed xiphosurid in Morocco (Van Roy *et al.*, 2010). It is clear that the synziphosurines described to date are at best offshoots of the xiphosurid stem and not the direct ancestors of xiphosurids as inferred by Anderson & Selden (1997) for a few taxa. While the retention of plesiomorphic conditions in taxa is not unusual it should be remembered that these offshoots will have continued following their own evolutionary development, no matter how imperceptible, and autapomorphies, convergences and parallelisms can complicate attempts to resolve their affinities. Hence, character polarity is key to resolving the relationships of groups with a high proportion of ghost ranges and it is because of this that outgroup selection is of utmost importance for any analysis.

Unfortunately, as we shall see for Xiphosura, this can be a particularly complex issue.

The monophyly of Xiphosura therefore remains to be fully tested. With the discovery of Ordovician xiphosurids the previous hypotheses of the group's evolutionary history (e.g. Bergström, 1975; Fisher, 1984; Selden & Siveter, 1987; Anderson & Selden, 1997) are all shown to be in need of revision. With the knowledge that there are large gaps in the xiphosuran fossil record it is now opportune to re-evaluate the relationships of the known species without allowing their stratigraphic position to overly influence their hypothesized affinities. Many species have remained largely neglected over the last century, however, and would benefit from restudy. The Mesozoic *Limulina*, in particular, need revision, so a phylogenetic treatment of all species is not possible, but these species are less critical to working out the origins of the group. Instead, the present work utilizes a number of well-known or recently redescribed taxa to elucidate the exact relationship of the synziphosurines to the xiphosurids within the context of the higher euchelicerates. This includes a critical re-evaluation of the homology statements employed by previous workers and the polarization of these characters.

## TERMINOLOGY

### ARTHROPOD SEGMENTATION

Throughout this discussion a number of aspects of generalized arthropod morphology will be dealt with, and these are briefly defined here. The fundamental division of the arthropod body is the somite, or metamere (Lankester, 1904). The first somite is here termed the ocular/protocerebral region (Scholtz, 1995), which is considered equivalent to the concept of the arthropod acron (see Scholtz & Edgecombe, 2006), and is numbered 0. The subsequent somites are numbered using roman numerals from anterior to posterior; in xiphosurans this ranges from I to XVII. The convention adopted by Selden & Siveter (1987) of separating segments from somites is adopted here; a segment refers to an externally differentiated unit that may comprise multiple somites, and is often used when segmentation is obvious but somite count is uncertain, as can be the case for xiphosurans. Segments are labelled using arabic numerals, with the first post-cephalic segment numbered 1. The dorsal sclerite of each segment is termed the tergite, while the ventral sclerite is the sternite. Somites frequently undergo differentiation as part of specialization of limb form and function. The arthropod body is divided into regions of serial somites exhibiting a characteristic differentiation and each of these regions are termed

tagmata. The term pseudotagma is applied to a division of the body that appears to be a distinct unit but does not represent a true tagma (van der Hammen, 1980).

The definition of what constitutes a tagma has varied throughout its use. Lankester (1904) defined a tagma as a definite region of similar modification of the somites and their appendages, differing in their modification from that observed in regions preceding and succeeding them – modification was defined as a difference in any of the four ‘meromes’ that comprise each somite, in arthropods namely the tergite, sternite, muscular fibres and the appendages. Lankester (1904) noted (and implicitly criticized) a tendency to define tagma based exclusively on the form of the tergites and appendages, and this is a practice that has been largely maintained to this day. Subsequently, some authors have considered tagmosis to be defined by specialization of the appendages (Flessa, Powers & Cisne, 1975), while others view tagmosis to be primarily a property of the dorsal exoskeleton. van der Hammen (1980: 155) described a tagma as a ‘division of the body, composed of a series of more or less similar segments or metamerer, and constituting a distinct unity characterised by its own individuality’. In the same publication the term pseudotagma was simply defined as a ‘division of the body, constituting a more or less distinct unity with its own individuality, but not representing a true tagma’ (van der Hammen, 1980: 131). These conflicting (and often vague) definitions of what constitutes a tagma has resulted in a fair degree of subjectivity in defining an arthropod's tagmosis, although in more recent work on trilobites a somewhat more strict definition of a tagma was used: a discrete morphological entity which is distinct in at least the dorsal exoskeleton from its first appearance in ontogeny so that its boundaries with adjacent regions are never crossed by newly recruited or released segments (Minelli, Fusco & Hughes, 2003), a definition already used in many neontological works. Yet this definition does not cover conditions where the dorsal evidence for tagmata does not correspond to the ventral (primarily appendicular) evidence, as appears to be the case in a number of arthropods including trilobites, xiphosurans, Acari, and other chelicerate groups. It also fails to differentiate tagmata from pseudotagmata. The concept of pseudotagmata appears to stem from the work of van der Hammen (1963) on the subdivisions of parasitiform Acari and was then extended for use in the other chelicerate groups (van der Hammen, 1986a, b) but has not found widespread use among other arthropod workers. It seems that there is a great utility in the pseudotagma concept that has gone largely unrecognized but has the potential to aid in providing a clearer definition for arthropod tagmata. Tagmata are

most comprehensible as regions of functional specialization, which in arthropods is predominantly mediated through modification or suppression of the appendages. The definition for a tagma adopted herein is therefore a distinct and discrete morphological region that comprises a series of equivalently modified appendages that constitute a unit of specific form (as in the case of the malacostracan abdomen) or sometimes function (as in the hexapod head). The first or last appendages of a tagma may, however, be dramatically differentiated from the others; examples include the chelicera in chelicerates (first appendage of the prosoma), antennula in crustaceans, myriapods, and hexapods (first appendage of the cephalon), the chilaria in xiphosurans (first appendage of the opisthosoma), and the uropods in decapod crustaceans (last appendage of the abdomen). Further to this, the boundaries of a tagma should never be crossed by newly recruited or released segments throughout the organism's ontogeny. Using this definition, the trilobite pygidium would not constitute a tagma as segments of the thorax develop from the anterior end of the pygidium; instead, it would constitute a pseudotagma – see discussion below. While this definition may appear to discount the differentiation produced by the fusion of tergites, Lankester (1904) effectively argued that such fusion was essentially superficial and easily acquired through a disposition of chitinous cuticle of equal thickness across an area instead of the usual thinning at the segment boundary that results in a discrete tergite. Such fusions do, however, fall within the realm of pseudotagma.

Herein the term pseudotagma is used to refer to units defined by differentiation of the tergites or sternites without an associated change in form or function of the appendages. This definition is consistent with its use in Acari for defining the gnathosoma and idiosoma, or proterosoma and hysterosoma, which is based on a dorsal division that is independent of appendage structure (Fig. 1A). For this reason, too, the trilobite pygidium represents a pseudotagma (Fig. 1B). Pseudotagmata can be further subdivided into functional pseudotagmata and non-functional pseudotagmata; functional pseudotagmata impose some type of functional constraint on the organism,

and fused tergite series enforce such a constraint. The solifuge cephalosoma (demarcated dorsally by the propeltidium), which like the acariform proterosoma is also differentiated ventrally by the sejugal furrow (see Dunlop, Krüger & Alberti, 2012), is also defined as a functional pseudotagma as there is no differentiation in the form of the appendages of the prosoma (Fig. 1C). Furthermore, if the cephalic appendages in trilobites are in fact undifferentiated from the trunk appendages (Hughes, 2003a; Minelli *et al.*, 2003) then the trilobite cephalon also represents a functional pseudotagma and trilobites therefore possess only a single tagma (Fig. 1B). Non-functional pseudotagmata, meanwhile, are the most subjective type of arthropod body division and are largely limited to changes in tergite or sternite dimensions, most usually width, or are defined by alterations in cuticle ornamentation or the presence or absence of epimera. Examples of non-functional pseudotagmata are the divisions of the olenelline trilobite thorax proposed by Lauterbach (1980, 1983, 1989), demarcated by the third macropleural segment, and the xiphosuran preabdomen and postabdomen, which are discussed further below.

#### XIPHOSURA

The terminology for aspects of xiphosuran morphology largely follows Siveter & Selden (1987) and Selden & Siveter (1987). The prosoma comprises the entirety of the anterior tagma, including the dorsal carapace and the prosomal appendages. The prosomal appendages are denoted by roman numerals I–VI, appendage I being the chelicerae. In limulids the anterior cephalic region is termed the cephalothorax by Shultz (2001) as a number of opisthosomal somites have been at least partially incorporated into the prosoma (Fig. 1D). The carapace/cephalothorax itself bears a number of structures; the cardiac lobe is located at the posterior of the carapace and is axially inflated, while the ophthalmic ridges extend either side of the cardiac lobe and dorsally shade the lateral compound eyes. Anterior to the cardiac lobe the median ocelli, simple eyes, can be identified in a number of taxa. Some species bear extraophthalmic ridges, transverse ridges that are arrayed on the

**Figure 1.** Schematic diagrams of a number of different arthropods showing examples of functional pseudotagmata compared with true tagmata. Somites are labelled 0–XVII; ‘tl’ indicates the telson, ‘m’ the mouth, ‘a’ the anus, and ‘g’ the gonopores. A, the oribatid mite *Epilohmannia cylindrica* (Berlese, 1904). B, the trilobite *Olenoides serratus* (Rominger, 1887). C, the solifuge *Galeodes armeniacus* Birula, 1929. Solifuge arachnids possess opercula on the first three opisthosomal segments associated with the genital ducts and respiratory spiracles. These opercula could be considered homologous to the opercula of the thelyphonid *Mastigoproctus giganteus* (Lucas, 1835) which Shultz (1993) showed to be opisthosomal appendages that had become completely sutured to the ventral body wall. D, the limulid xiphosurid *Limulus polyphemus* Linnaeus, 1758.



A

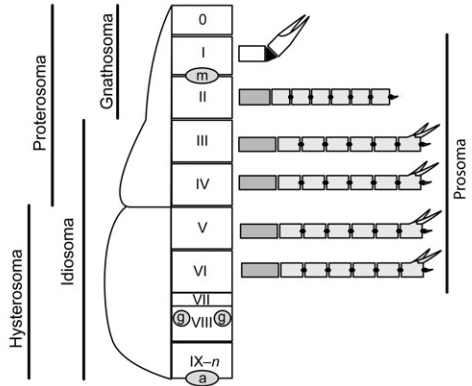

Functional Pseudotagmata

Tagmata

B

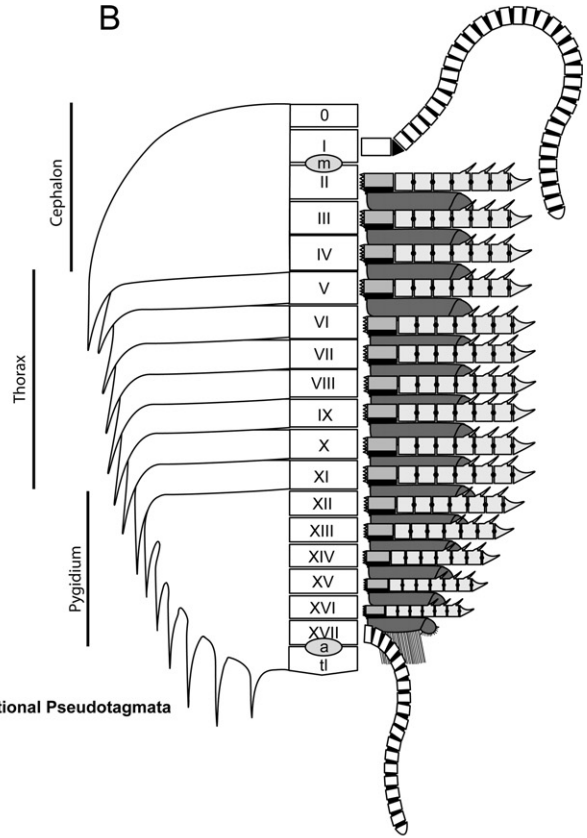

Functional Pseudotagmata

C

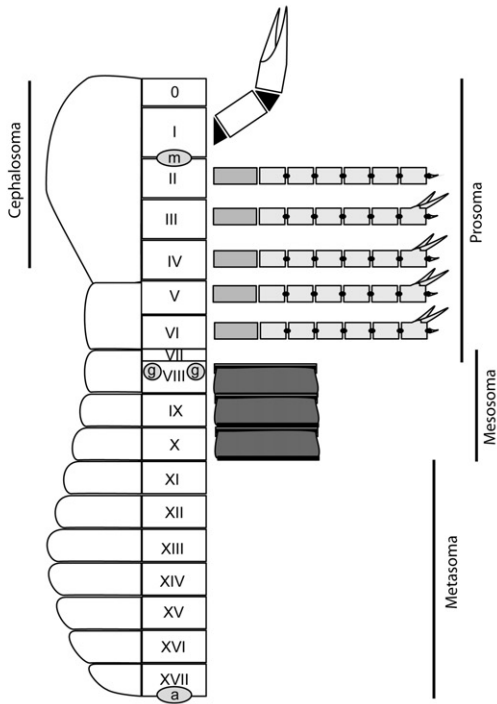

Functional Pseudotagmata

Tagmata

D

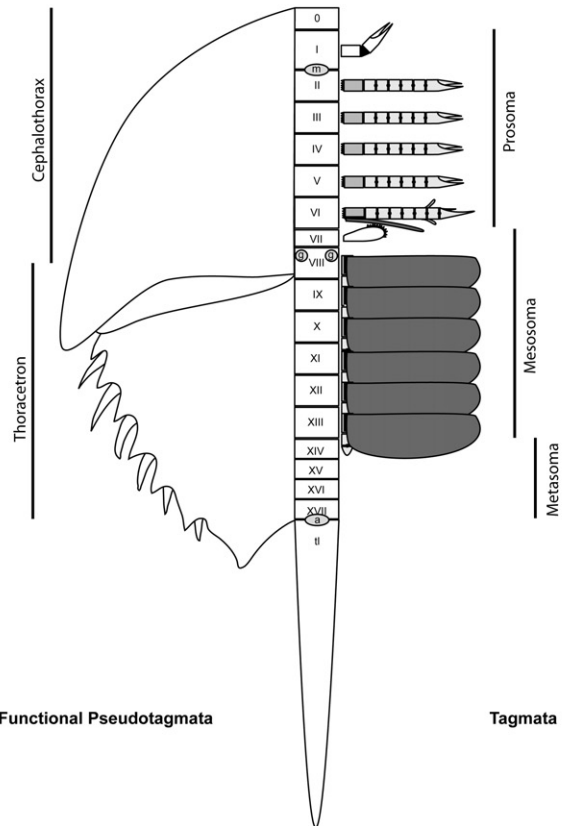

Functional Pseudotagmata

Tagmata

surface of the carapace outside of the ophthalmic ridges. Interophthalmic ridges occur within the area demarcated by the ophthalmic ridges, and may correspond to internal apodemes for the attachment of extrinsic limb musculature, indicating arrangement of the prosomal appendages.

The term opisthosoma refers to the post-prosomal segments, and is equivalent to the trunk region of other arthropods (see Hughes, 2003a, b). The opisthosoma itself is not considered a single tagma, contrary to most recent treatments. Lankester (1904) considered chelicerates to possess three tagmata based on appendage differentiation: the prosoma, mesosoma, and metasoma. The prosoma comprises somites I–VI, the mesosoma somites VII–XIII, and the metasoma somites XIV–XVII (in xiphosurans, eurypterids, scorpions, and probably chasmataspidids the metasoma is formed from somites XIV–XIX). van der Hammen (1986a) termed the mesosoma and metasoma pseudotagmata and this has been followed by subsequent authors including Selden & Siveter (1987) and Rudkin *et al.* (2008), although van der Hammen considered the mesosoma to consist of somites VII–XIV and the metasoma somites XV–XIX (in scorpions). This in fact corresponds to the preabdomen and postabdomen; these are actually non-functional pseudotagmata defined by a dorsal constriction of the tergites (Fig. 2). In xiphosurans the postabdomen comprises somites XV–XVII, while eurypterids frequently correspond to the condition in scorpions but sometimes have a preabdomen and postabdomen that corresponds to the true tagmata of mesosoma and metasoma. In chasmataspidids the situation is somewhat different, having somites VII–X fused together into a buckler and somites XI–XIX forming a freely articulating postabdomen. These are, however, considered to be functional pseudotagmata, as the fusion of the buckler places a functional constraint on the organism.

Somite VII is considered to be opisthosomal in origin, as is the conventional view (see Snodgrass, 1952), and not prosomal as suggested by Stürmer & Bergström (1981) (see also Haug *et al.*, 2012a for discussion on this subject). Evidence for this is shown in the dorsal expression of somite VII as a fully sclerotized tergite in synziphosurines (Fig. 3A) and chasmataspidids (Fig. 3B) and in the way the tergite remains attached to the opisthosoma after disarticulation of the carapace (Fig. 4A, B). This tergite is termed the microtergite in chasmataspidids, but this refers specifically to the heavily reduced condition seen in these taxa and the term pre-opercular tergite is used herein while microtergite is applied as a condition which the pre-opercular tergite can attain. The tergite of somite VIII may be called the opercular tergite and is hypertrophied in some synziphosurines.

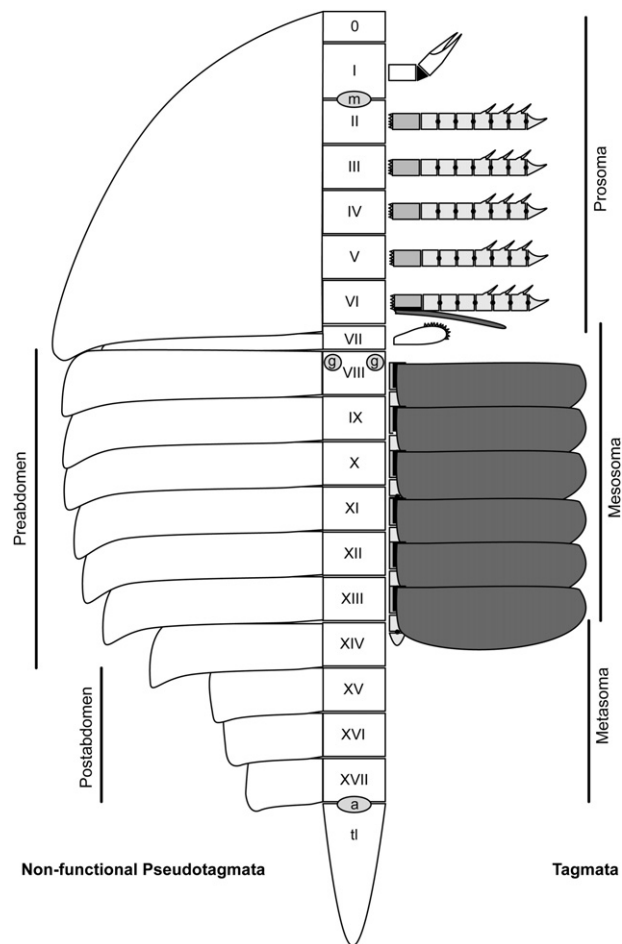

**Figure 2.** Schematic of a generalized synziphosurine arthropod, showing the distinction between the preabdominal and postabdominal non-functional pseudotagmata and the true tagmata of the prosoma, mesosoma, and metasoma.

Embryological studies have shown that in limulids the tergite of somite VII and part of the tergite of somite VIII are incorporated into the prosoma (Scholl, 1977; Sekiguchi, Yamamichi & Costlow, 1982) with the lateral portions of the opercular tergite distinctly set off from the main body of the tergite, frequently deflected dorsally towards the outer margin, and these regions are termed free lobes. The term thoracetron is used for the fully fused dorsal opisthosomal shield in xiphosurids.

The opisthosomal appendages in aquatic chelicerates are modified into flattened opercula that bear the respiratory organs, termed book gills. In xiphosurans the opercula are not medially fused, although in modern xiphosurids they are connected by a thin membrane which would be unlikely to fossilize, and so its presence in extinct taxa is equivocal. The operculum of somite VIII is the genital operculum and bears



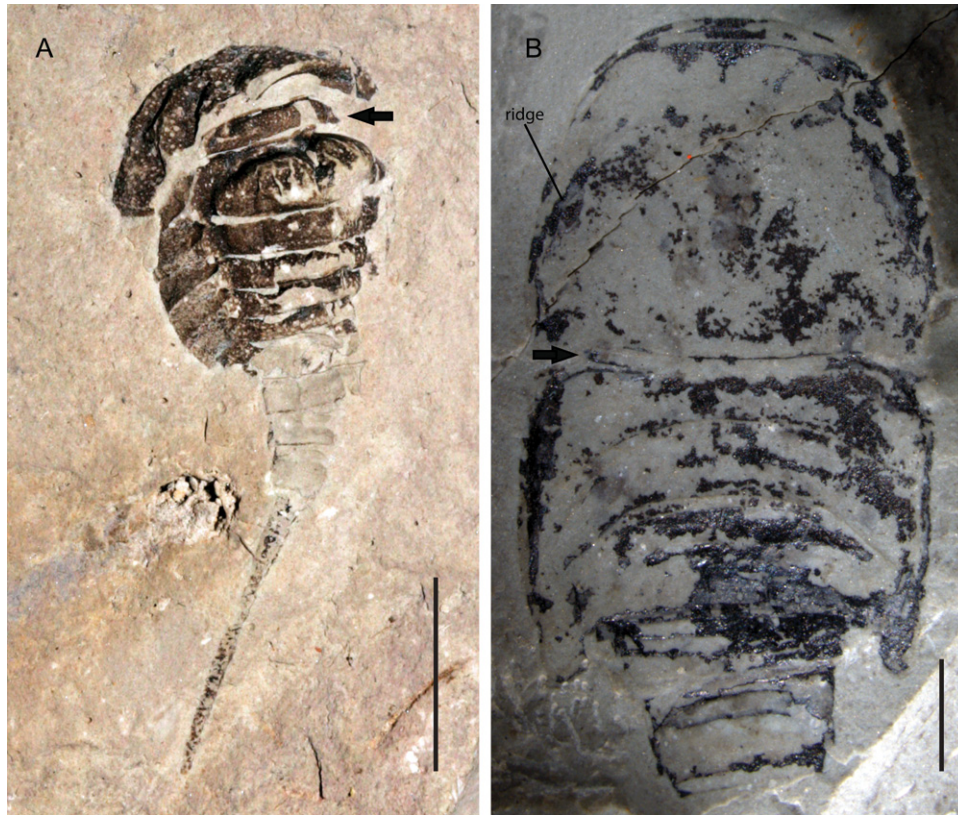

**Figure 3.** A, *Bunodes lunula* d'Eichwald, 1854 from the late Silurian (Ludlow) of Oesel, Estonia. Specimen ELM G1:262:2, clearly showing the partially reduced pre-opercula tergite of somite VII (arrowed) between the downturned carapace and the hypertrophied tergite of somite VIII. Scale bar = 10 mm. B, '*Eurypterus*' *stoermeri* Novojilov, 1959, a chasmataspidid from the early Devonian (Lochkovian) of Siberia, Russia. Specimen PIN 1138-1, exhibiting the microtergite of somite VII (arrowed) positioned between the carapace and the buckler. The microtergite curves anteriorly towards its lateral edges, and is particularly noticeable on the left-hand side. The occurrence of ridges associated with the lateral eye on the carapace is also labelled. Image courtesy of Dave Marshall. Scale bar = 2 mm.

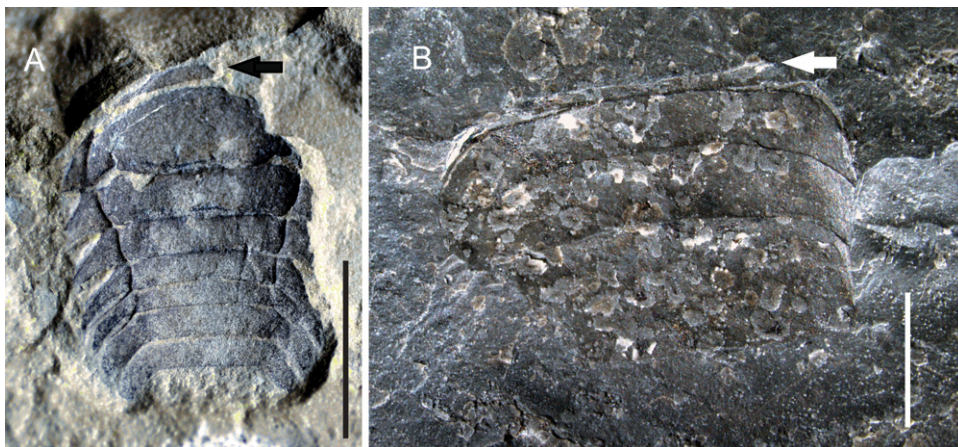

**Figure 4.** A, *Pasternakevia podolica* Selden & Drygant, 1987 from the late Silurian (Ludlow) of Zalissia, Ukraine. Specimen ISEA I – F/MP/3/1499/08, isolated opisthosoma with articulated microtergite of somite VII (arrowed). Image courtesy of Ewa Krzemińska. Scale bar = 10 mm. B, undescribed chasmataspidid from the Lower Devonian (Emsian) of Siberia, Russia. Specimen PIN 5116-6, disarticulated buckler with microtergite of somite VII (arrowed) still firmly attached to its anterior margin. Image courtesy of Dave Marshall. Scale bar = 2 mm.

the paired gonopores; in modern xiphosurids the genital operculum is devoid of respiratory structures, but they are present on the genital operculum of *Offacolus* Orr *et al.*, 2000 and the condition is unclear in *Weinbergina*. The appendages of somite VII are functionally incorporated into the prosoma and may be retained as fully pediform walking limbs or reduced to chilidia, which act in a masticatory function.

The institutional abbreviations for xiphosuran specimens figured in this study are as follows: ELM, Estonian Museum of Natural History, Tallinn, Estonia; ISEA, Museum of the Institute of Systematics and Evolution of Animals, Kraków, Poland; MM, Manitoba Museum, Winnipeg, Canada; PIN, Paleontological Institute, Moscow, Russia; PWL, Landessammlung für Naturkunde Rheinland-Pfalz, Mainz, Germany; SMF, Naturmuseum und Forschungsinstitut Senckenberg, Frankfurt am Main, Germany.

#### EVIDENCE FOR XIPHOSURAN MONOPHYLY?

Dunlop & Selden (1997) listed four synapomorphies that united Xiphosura as a monophyletic taxon within Chelicerata: the presence of ophthalmic ridges, a cardiac lobe on the carapace, an axial region of the opisthosoma, and a reduced pre-opercular segment. However, as noted elsewhere (Lamsdell, 2011), at least two of these 'synapomorphies' are actually found in several other potentially closely related chelicerate groups: a cardiac lobe is widespread in eurypterids (see Selden, 1981) and present in chasmataspidids (Dunlop, Anderson & Braddy, 2004) while a reduced pre-opercular segment is present as a microtergite in chasmataspidids (Dunlop *et al.*, 2004) and potentially in a heavily reduced form in eurypterids (Dunlop & Webster, 1999). Furthermore, the division of the trunk tergites into an axial and tergopleural region is common in arthropods, being most obvious in the three-lobed bodies of trilobites. The dorsal axial region corresponds to the position of ventral limb insertion, with the appendages arrayed so they attach to the body just inside the lateral margin of the axis (see Whittington & Almond, 1987 for a trilobite example). Initially it would appear that the axis in xiphosurans does not correspond to the opisthosomal limb insertion as the trunk limbs have been modified into laterally expanded opercular flaps that extend across the entirety of the ventrum (Fig. 5A), whereas the axis takes up just one-quarter of the thoracetrone's width (Fig. 5B), although after removing the opercula it is apparent that their insertion is limited to the margin of the axial region (Fig. 5C, D). The axis therefore is homologous to the condition found in other arthropods and is not a suitable synapomorphy

for Xiphosura. Furthermore, an axial region similar to that of xiphosurans is present in the euchelicerate *Offacolus kingi* Orr *et al.*, 2000, while a differentiated axial region that may be homologous is observed in *Chasmataspis laurencii* Caster & Brooks, 1956. Hints of similar structures (albeit extremely poorly preserved) may exist in *Diploaspis muelleri* Poschmann, Anderson & Dunlop, 2005 and *Diploaspis casteri* Størmer, 1972. The presence of these structures in other chelicerates rules out the possibility that the xiphosuran axial region is a re-expression of a characteristic not otherwise present in the chelicerate ground plan.

Ophthalmic ridges, the final proposed synapomorphy, occupy a similar position to the palpebral lobes of eurypterids and chasmataspidids and may in fact be transformational homologues. Furthermore, in a number of xiphosurans the ophthalmic ridges are only weakly developed or absent altogether. While this does not invalidate ophthalmic ridges as a potential xiphosuran synapomorphy, the presence of ridges associated with the palpebral lobes in some chasmataspidids poses more of a problem. Best known from *Octoberaspis ushakovi* Dunlop, 2002, these structures consist of ridges extending from the palpebral lobe along the length of the carapace and appear almost identical to the ophthalmic ridge, the only difference being the much more prominent nature of the lateral eye (Dunlop, 2002: fig. 6A). Although poorly preserved, ridges in the same region of the carapace can potentially be discerned on the only known specimen of *Forfarella mitchelli* Dunlop, Anderson & Braddy, 1999 (Dunlop *et al.*, 1999: fig. 1) and '*Eurypterus*' *stoermeri* Novojilov, 1959 (Fig. 3B), a species in need of being redescribed as a chasmataspidid. The presence of ophthalmic ridges in some chasmataspidid species also nullifies this character as a xiphosuran synapomorphy. This leaves them currently with no recognized characters uniting the group to the exclusion of other chelicerates. This is not a unique occurrence; after the discovery that chasmataspidids possessed both a metastoma and a genital appendage (Dunlop, 2002; Tetlie & Braddy, 2004) eurypterids were left without a synapomorphy, until the realization that the fusion of appendages VIII and IX to form the genital operculum was a unique characteristic (Lamsdell, 2011).

The monophyly of chasmataspidids has also been seriously questioned, with Tetlie & Braddy (2004) proposing a scenario in which chasmataspidids form a paraphyletic grade towards eurypterids. This analysis failed to account for a number of characters, however, including the formation of the chasmataspidid buckler, and incorrectly plots the distributions of some characters on the tree (the presence or otherwise of deltoid plates and the anterior opercular



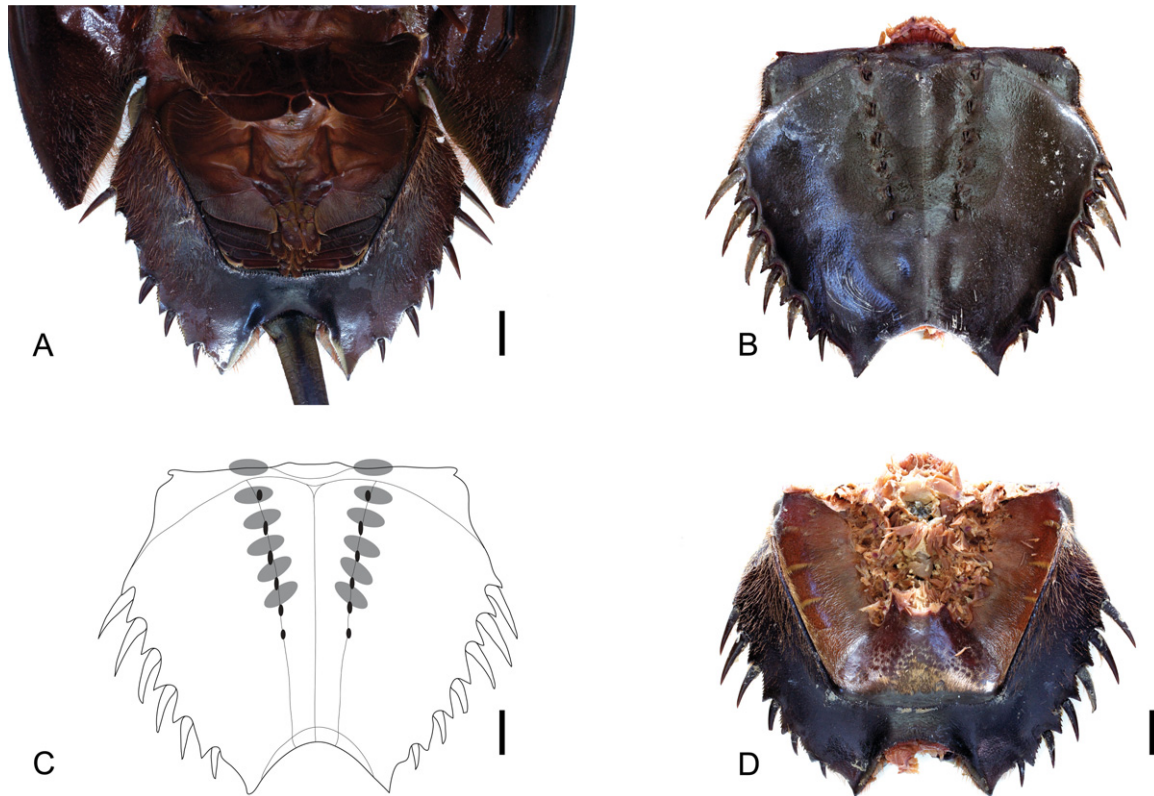

**Figure 5.** *Limulus polyphemus* Linnaeus, 1758 from the Recent of North America. A, ventral view of opisthosoma showing opercula. B, dorsal view of opisthosoma with prosoma and telson removed. C, schematic of opisthosoma in dorsal view with apodemes (shallow pits indicating sites of muscle attachment) marked in black and the insertion points of the opercula shown by grey ovals. D, ventral view of opisthosoma with prosoma, telson, and opercula removed. It can be clearly seen that the opercula are not attached to the lateral regions of the opisthosoma. Scale bars = 10 mm.

plate, specifically) as well as assuming that several characteristics such as the chasmataspidid ventral plate and the chelate prosomal appendage of *Chasmataspis* Caster & Brooks, 1956 are plesiomorphies. Without a suitable outgroup taxon to polarize the characters there is no way to tell whether these are indeed plesiomorphic (although it is worth noting that ventral plates are at present known solely from chasmataspidids; furthermore, chelate prosomal appendages are known from *Offacolus kingi* and xiphosurids but are demonstrably absent from synziphosurines when the appendages are preserved and so it appears that this character has evolved more than once within Chelicerata). A metastoma and genital appendage may yet be shown to be present in *Chasmataspis*, and if undescribed Cambrian resting traces figured in Dunlop *et al.* (2004) are indeed produced by a *Chasmataspis*-like animal then it clearly possessed opercula at a minimum. Given the current evidence it seems most likely that chasmataspidids also represent a monophyletic group defined by the possession of a four-segmented buckler with ventral plate (the two characters almost certainly being linked).

Other previously unconsidered characters may serve to define a monophyletic Xiphosura. Opisthosomal segment count is a tempting character, especially given that an opisthosomal segment count of 13 is consistent across chasmataspidids, eurypterids, and scorpions, probably constituting the arachnid ground plan (Dunlop & Webster, 1999). This results in a total post-ocular (all segments except the protocerebral region) somite count of 19. Many arachnids, however, including Pantetrapulmonata, exhibit only 18 somites (Shultz, 2007) but this could potentially be accounted for by the complete suppression of somite VII. The ground pattern for Xiphosura (and potentially Euchelicerata) most likely comprises 11 opisthosomal segments, or 17 somites in total (Fig. 6) as evidenced by a number of fossil taxa and the fact that the neural ganglia for 17 somites are still identifiable in *Limulus* Müller, 1785 (Scholl, 1977). In terms of unfused segments, *Legrandella* Eldredge, 1974 clearly shows 11 segments dorsally (Eldredge, 1974: figs 1, 3) while *Weinbergina* shows ten tergites with a small microtergite assumed to be present but recessed beneath the carapace (Stürmer & Bergström, 1981). However,

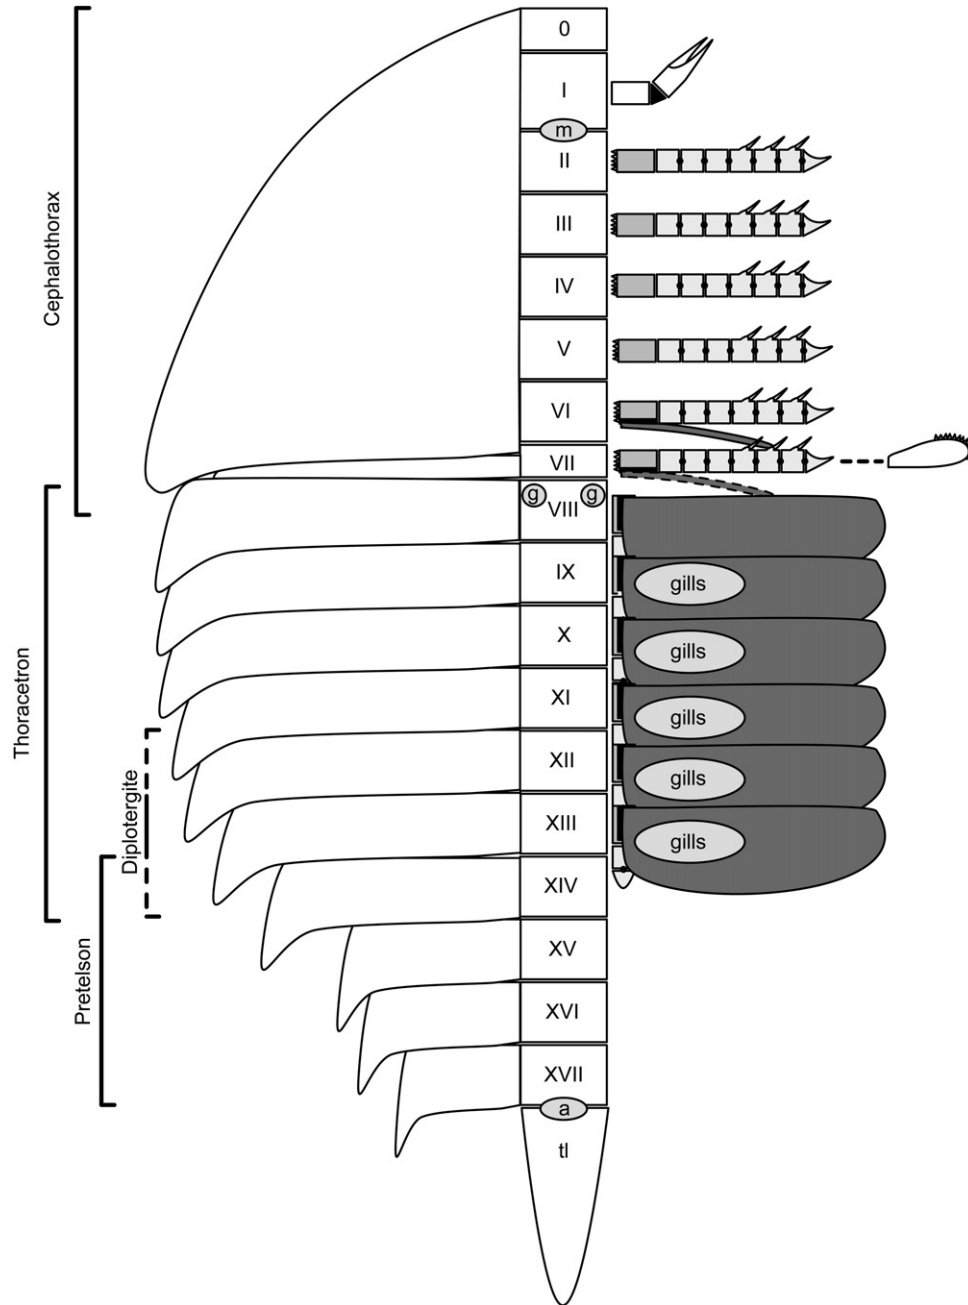

**Figure 6.** Schematic of the xiphosuran ground pattern. Somites are labelled 0–XVII; ‘tl’ indicates the telson, ‘gills’ the position of gills on the five posterior opisthosomal appendages, ‘m’ the mouth, ‘a’ the anus, and ‘g’ the gonopores. The appendages are shaded with the light ramus representing the endopod, the light grey the basipod, and the dark grey the exopod. The appendage of somite VII is reduced in the majority of taxa into the chilaria. It is possible that appendage VII may also have possessed a reduced exopod as in appendage VI given its intermediate position between appendage VI and the biramous opisthosomal appendages, but there is currently no evidence for this. To the left the somite compositions of the fused xiphosurid cephalothorax, thoracetreron, and pretelson are shown, along with the varying combinations of segments that can form the diplotergite in bunodids and pseudoniscids.

Anderson, Poschmann & Brauckmann (1998) considered *Weinbergina* to possess only ten opisthosomal segments, a view adopted by Moore, Briggs & Bartels (2005a). The appendages of *Weinbergina* show that tergite VII cannot be the first dorsally visible opisthosomal tergite as this segment bears opercula; the pediform walking limbs of somite VII originate from the prosomal region (Stürmer & Bergström, 1981: fig. 6; Moore, Briggs & Bartels, 2005a: fig. 2), indicating that they have already been encephalized and their corresponding tergite is either obscured by the carapace fold or has also been incorporated into the prosoma. Thus, both *Weinbergina* and *Legrandella* have an 11-segmented opisthosoma. There is a general trend, however, for segments to become fused, the most extreme example being the xiphosurid thoracetron, while certain synziphosurines (some bunodids and pseudoniscids) also exhibit fusion of the two posterior preabdominal segments. Furthermore, the majority of synziphosurine taxa seem to possess only ten opisthosomal segments [two of which are fused in *Cyamocephalus* Currie, 1927 and *Pseudoniscus* Nieszkowski, 1859 (Anderson, 1999)], as do most xiphosurids including *Lunataspis aurora* Rudkin, Young & Nowlan, 2008. *Limuloides* Woodward, 1865 and *Bunodes* d'Eichwald, 1854 also possess fused segments that at first appear to occupy the same position as in *Cyamocephalus* and *Pseudoniscus* (Størmer, 1955), but *Bunodes* and *Limuloides* possess 11 opisthosomal segments (Bergström, 1975) and so the tergites that have fused are not homologous (XIII and XIV as opposed to XII and XIII). This suggests that tergite fusion has occurred independently in a number of xiphosuran groups. A further complication of using opisthosomal segment count to define Xiphosura is the possibility that the total somite count of 17 represents a plesiomorphic condition. The megacheiran arthropod *Yohoia tenuis* Walcott, 1912 possesses a 13-segmented trunk and a head bearing the great appendages and three postantennular appendages for a total of 17 somatic segments (Haug *et al.*, 2012b), a somite count potentially shared with *Haikoucaris ercaiensis* Chen, Waloszek & Maas, 2004, although the number of cephalic appendages in this taxon is unclear. Megacheirans are one of the potential sister groups to Chelicerata, as first proposed by Størmer (1944) [not Cotton & Braddy (2004) as suggested by Haug *et al.* (2012b)] and retrieved through cladistic analysis by Briggs & Fortey (1989), and it is therefore possible that 17 somites is the plesiomorphic state retained by xiphosurans from megacheiran ancestors.

Two other potential synapomorphies remain. Axial nodes are found on a number of xiphosurids and several synziphosurines including *Weinbergina* (Stürmer & Bergström, 1981), *Legrandella* (Eldredge, 1974), *Willwerathia* Størmer, 1969 (Anderson *et al.*,

1998), and *Limuloides* (Woodward, 1872). Pseudoniscids, along with the remaining bunodids, lack axial nodes (Anderson, 1999; Krzemiński, Krzemińska & Wojciechowski, 2010). The presence of axial nodes, however, is probably the plesiomorphic condition and therefore not a good clade-defining character, as they are also known from *Offacolus kingi*, which is considered to be the most basal known euchelicerate (Dunlop, 2006; this study). Finally, a three-segmented postabdomen is present in all synziphosurines (except perhaps *Pasternakevia podolica* Selden & Drygant, 1987) with three segments also visible in the fused postabdomen of the xiphosurid *Lunataspis aurora*, although the postabdomen has become fused into a single segment in all other xiphosurids. The pattern of tagmosis in *Offacolus kingi* is somewhat unclear; Sutton *et al.* (2002) describe their specimens as possessing a three-segmented preabdomen (for which they incorrectly use the term mesosoma) and a five-segmented postabdomen (their metasoma). However, the first postabdominal tergite is identical in form to the preabdominal tergites and the terminal segment is little more than a boss that forms the articulating base for the telson; a similar structure is seen in eurypterids, xiphosurids, and ceraticarids, and is derived from the telson itself rather than the trunk. This would appear to reduce the number of postabdominal segments to three, making this count plesiomorphic with respect to xiphosurans. Accounting for the ventral trunk appendages reveals a different situation, however. *Offacolus* possesses six pairs of trunk appendages, one pair for each of the first six opisthosomal tergites. This represents the mesosoma and shows that a full, six-segmented mesosoma was part of the euchelicerate ground plan. Sutton *et al.* (2002) show that the posterior three opercula are reduced and devoid of respiratory structures, although the lack of respiratory structures is not a significant enough difference to warrant the exclusion of these segments from the mesosoma. The erroneous mesosoma/metasoma division employed by Sutton *et al.* (2002) stems from a failure to appreciate the dichotomous nature of the mesosoma/metasoma and preabdomen/postabdomen tagma (see Terminology), and it is clear that the mesosoma of *Offacolus* consists of six segments while the metasoma comprises just a single segment.

The division into preabdomen and postabdomen is less clear. Although the postabdomen generally consists of fewer segments than the metasoma (for example three or four metasomal segments in xiphosurans and five or six metasomal segments in eurypterids) it is actually defined solely on dorsal taper and tergite differentiation. The postabdomen of *Offacolus* is therefore defined as comprising three fused segments, two of which bear opercula. This



condition of having opercula-bearing postabdominal segments is not unique among Chelicerata; Upper Cambrian trace fossils that show some morphological affinities to *Chasmataspis* (Dunlop *et al.*, 2004) clearly possess six pairs of opercula while having a three-segmented preabdomen and a nine-segmented postabdomen. Further uncertainty regarding the utility of a three-segmented postabdomen in defining Xiphosura arises from *Yohioia tenuis* which also lacks appendages on the three terminal trunk segments. The tergites of these segments are also differentiated from those that precede them, narrowing consecutively and bearing shorter, more acute epimera. This too may indicate that a postabdomen of three segments is the plesiomorphic condition.

In summation, a post-ocular somite count of 17 may in fact serve to unify Xiphosura to the exclusion of all other euchelicerates, as might a postabdomen consisting of three segments, but these could also prove to be plesiomorphic depending on which taxa are eventually shown to constitute the sister group to Chelicerata. Thus all of the characters previously proposed as uniting Xiphosura are either plesiomorphic or also present in other euchelicerates and at present there are no convincing synapomorphies of the group.

#### PHYLOGENETIC ANALYSIS

While this refutation of the evidence for xiphosuran monophyly may seem compelling, one needs to take into account all the available morphological data. To thoroughly evaluate the signal of the current data a phylogenetic analysis was performed incorporating 12 of the most completely preserved synziphosurines, along with four xiphosurids, *Offacolus kingi*, and representatives of Eurypterida, Chasmataspidida and Arachnida. In total 27 euchelicerate taxa were included in the analysis, along with a further ten non-euchelicerate arthropods (Table 1), coded based solely on characters either observable in directly studied specimens or in photographs published in the literature. *Camera lucida* drawings, reconstructions and descriptive text were not used as sources for taxon coding so as to avoid undue interpretation. Pycnogonids are frequently considered the sister group to Euchelicerata, together forming the subphylum Chelicerata; however, it has been proposed that pycnogonids represent the sister group to all other euarthropods, which form a clade termed Cormogonida (see Dunlop & Arango, 2005 for a review). For this analysis pycnogonids were treated as ingroup taxa, *contra* the Cormogonida hypothesis, as supported by a number of recent molecular analyses (Regier *et al.*, 2010; Rota-Stabelli *et al.*, 2011). Three species were included: the fossil taxa *Haliestes dasos*

**Table 1.** Taxa included in the phylogenetic analysis including their higher-level taxonomic assignment

| Species                                     | Assignment               |
|---------------------------------------------|--------------------------|
| <i>Fuxianhuia protensa</i>                  | Stem euarthropod         |
| <b><i>Olenoides serratus</i></b>            | Trilobita                |
| <b><i>Emeraldella brocki</i></b>            | Xenopoda                 |
| <b><i>Sidneyia inexpectans</i></b>          |                          |
| <b><i>Alalcomenaeus cambricus</i></b>       | Megacheira               |
| <i>Leancoilia illecebrosa</i>               |                          |
| <i>Yohioia tenuis</i>                       |                          |
| <i>Haliestes dasos</i>                      | Pycnogonida              |
| <i>Palaeoisopus problematicus</i>           |                          |
| <i>Pycnogonum litorale</i>                  |                          |
| <i>Offacolus kingi</i>                      | Euchelicerate            |
| <b><i>Bembicosoma pomphicus</i></b>         | Synziphosurines          |
| <b><i>Bunodes lunula</i></b>                |                          |
| <i>Camanchia grovensis</i>                  |                          |
| <b><i>Cyamocephalus loganensis</i></b>      |                          |
| <b><i>Kasibelinurus amicorum</i></b>        |                          |
| <i>Legrandella lombardi</i>                 |                          |
| <b><i>Limuloides limuloides</i></b>         |                          |
| <i>Pasternakevia podolica</i>               |                          |
| <i>Pseudoniscus roosevelti</i>              |                          |
| <i>Venustulus waukeshaensis</i>             |                          |
| <b><i>Weinbergina opitzi</i></b>            |                          |
| <b><i>Willwerathia laticeps</i></b>         |                          |
| <b><i>Euproops anthrax</i></b>              | Xiphosurida              |
| <b><i>Limulus polyphemus</i></b>            |                          |
| <i>Lunataspis aurora</i>                    |                          |
| <b><i>Paleolimulus signatus</i></b>         |                          |
| <i>Chasmataspis laurencii</i>               | chasmataspidids          |
| <i>Octoberaspis ushakovi</i>                |                          |
| <b><i>Eurypterus tetragonophthalmus</i></b> | Eurypterida              |
| <b><i>Parastylonurus ornatus</i></b>        |                          |
| <b><i>Rhenopterus diensti</i></b>           |                          |
| <b><i>Stoermeropterus conicus</i></b>       |                          |
| <b><i>Centruroides vittatus</i></b>         | Arachnida (Scorpionida)  |
| <i>Palaeophonon nunciatus</i>               |                          |
| <i>Galeodes armenicus</i>                   | Arachnida (Solifugae)    |
| <i>Mastigoproctus giganteus</i>             | Arachnida (Thelyphonida) |

Taxa shown in bold type are those for which original specimens were investigated for the analysis.

Siveter, Sutton, Briggs & Siveter, 2004 and *Palaeoisopus problematicus* Broili, 1928, and the extant *Pycnogonum litorale* (Ström, 1762). If pycnogonids do in fact represent the sister group to Euchelicerata, however, then they would appear to be highly apomorphic and it then becomes necessary to resolve the sister group to Chelicerata as a whole, although there is still a degree of controversy surrounding this matter. Previously, trilobites and trilobite-like arthropods had been considered to form the chelicerate stem

lineage (Størmer, 1944), a concept termed Arachnomorpha. A number of arachnomorph phylogenies have been carried out (e.g. Cotton & Braddy, 2004) without seriously testing the monophyly of the group, but Scholtz & Edgecombe (2005) explicitly rejected Arachnomorpha as a clade, placing the majority of trilobitiform taxa in the mandibulate stem lineage. The conclusions of Scholtz & Edgecombe have, however, been ignored by a number of workers who continue to perform phylogenetic analyses solely inclusive of 'arachnomorph' taxa (e.g. Hendricks & Lieberman, 2008). Therefore, three trilobitiforms were included in the analysis: the trilobite *Olenoides serratus* (Rominger, 1887), *Emeraldella brocki* Walcott, 1912, and *Sidneyia inexpectans* Walcott, 1911. Note that no mandibulates were included in the analysis; however, given that trilobites have been shown to resolve as part of a clade including mandibulates when both have been included in an analysis (e.g. Stein & Selden, 2012), *Olenoides* is here taken to represent Antennata, i.e. a clade including Mandibulata and its stem lineage taxa. Finally, the megacheiran arthropods *Alalcomenaeus cambricus* Simonetta, 1970, *Leanchoilia illecebrosa* Hou, 1987 and *Yohoia tenuis* were included in the analysis. Megacheirans are the most recent taxa to have been suggested as a sister group to chelicerates (e.g. Chen *et al.*, 2004; Dunlop, 2006), although whether megacheirans are monophyletic or paraphyletic varies between authors. Two taxa that are not included in the analysis but have previously been considered to be allied in some manner to chelicerates are *Aglaspis spinifer* Raasch, 1939 and *Sanctacaris uncata* Briggs & Collins, 1988. The similarities between *Aglaspis* and chelicerates are purely superficial, however; the supposed chelicerae were shown to be multisegmented and more similar to antenniform appendages by Briggs *et al.* (1979), while the head incorporates no more than four pairs of postantennular appendages (Hesselbo, 1992). Furthermore it is unclear whether the apparent uniramy of the appendages is preservational or genuine (it is worth noting that the trunk limbs of xiphosurans retain both endopods and exopods, and uniramy would preclude *Aglaspis* from being a direct chelicerate ancestor). The possession of a telson and the form of the smooth articulating facets on each tergite are also euarthropod plesiomorphies. When aglaspids have been included in recent phylogenetic analyses their position has proven to be rather inconstant, although they consistently resolve as relatively basal arthropods somewhat removed from chelicerates (Briggs & Fortey, 1989; Dunlop & Selden, 1997; Cotton & Braddy, 2004) and *Aglaspis* is here considered to show closer affinities to taxa such as *Emeraldella* as suggested by Van Roy (2006) and retrieved in the recent cladistic analysis by Ortega-

Hernández, Legg & Braddy (2012). *Sanctacaris* meanwhile was originally described as resolving within the subphylum Chelicerata based on its supposed possession of at least six pairs of encephalized appendages, a cardiac lobe, tagmata equivalent to the prosoma and opisthosoma, and the anus being positioned at the rear of the last trunk segment. The presently available material of *Sanctacaris*, however, bears no clear similarity to chelicerates; numerous phylogenetic analyses have consistently failed to resolve it in any proximity to the chelicerate clade (Briggs & Fortey, 1989; Briggs *et al.*, 1992; Wills, Briggs & Fortey, 1994). The prosomal/opisthosomal tagmosis is essentially a restatement of having more than four appendages in the head and, given that the opisthosoma is here considered equivalent to the trunk of other arthropods, is not a valid character to unite the species with chelicerates. The nature of the head appendages is not clear; it is possible that the rami described represent branches of a single appendage, or that some of the rami are exopods and others endopods, and although Boxshall (2004) has offered an interpretation of the appendages based on *Offacolus* the published material does not permit easy comparison. The 'cardiac lobe' does not resemble a true cardiac lobe, which should be positioned at the very posterior of the carapace, and the position of the anus is known to vary among other fossil arthropods. A number of characters, however, such as the clustered nature of the cephalic appendages and the morphology of the carapace, do invite some comparison with the Burgess Shale arthropods *Habelia optata* Walcott, 1912 and *Habelia* (?) *brevicaudata* Simonetta, 1964.

*Fuxianhuia protensa* Hou, 1987, considered to be a derivative of the euarthropod stem lineage, was used as outgroup for this analysis. Although phylogenetic analyses have previously placed *Fuxianhuia* within Euchelicerata (Wills, 1996), or as a component of a paraphyletic Megacheira (Budd, 2002; Kühl, Briggs & Rust, 2009), this is due to misinterpretation of the animal's morphology. These analyses consider a pair of tubular structures located within the head of *Fuxianhuia* to be subchelate appendages homologous to the great appendages of megacheirans, although these structures have also been interpreted as gut diverticulae (Waloszek *et al.*, 2005). The arguments for these structures being gut diverticulae are supported by the discovery of large gut diverticulae of similar morphology and position in *Emeraldella brocki* (Stein & Selden, 2012: fig. 4A) and this, combined with *Fuxianhuia* having a simple unsegmented exopod lobe and un-differentiated endopod podomeres, suggests that *Fuxianhuia* is a member of the euarthropod stem lineage with close affinities to crown Euarthropoda, as initially suggested (Chen

*et al.*, 1995; Edgecombe & Ramsköld, 1996). Even phylogenetic analyses that maintain an appendicular origin for the tubular structures in the head now resolve *Fuxianhuia* as the sister taxon to Euarthropoda (Daley *et al.*, 2009). As the most basic division of the Euarthropoda appears to be between Antennata and Chelicerata, both of which are represented as ingroup taxa within the analysis, it is appropriate that *Fuxianhuia*, as a stem-euarthropod with close affinities to the crown group, be used as the outgroup.

In total 37 taxa were coded for 114 characters (see the Supporting information); the matrix is deposited in morphobank (O'Leary & Kaufman, 2012) with the project code p724 and can be accessed from <http://morphobank.org/permalink/?P724>. Phylogenetic analysis was performed using random addition sequences followed by branch swapping (the *mult* command) with 100 000 repetitions with all charac-

ters unordered and of equal weight in TNT (Goloboff, Farris & Nixon, 2008; made available with the sponsorship of the Willi Hennig Society). Jackknife (Farris *et al.*, 1996), Bootstrap (Felsenstein, 1985) and Bremer support (Bremer, 1994) values were calculated in TNT and the consistency (CI), retention (RI) and rescaled consistency indices (RCI) were calculated in Mesquite 2.73 (Maddison & Maddison, 2010). The analysis resulted in 12 most-parsimonious trees with a tree length of 283, a strict consensus of which (showing branch support values) is in the Supporting information and is summarized here (Figs 7, 8). The strict consensus tree has an ensemble CI of 0.583, ensemble RI of 0.770, and an ensemble RCI of 0.449. Pycnogonids are resolved as the monophyletic sister group to Euchelicerata (Fig. 7) which together form Chelicerata, but Pycnogonida are highly autapomorphic and the reduced nature of the dorsal carapace

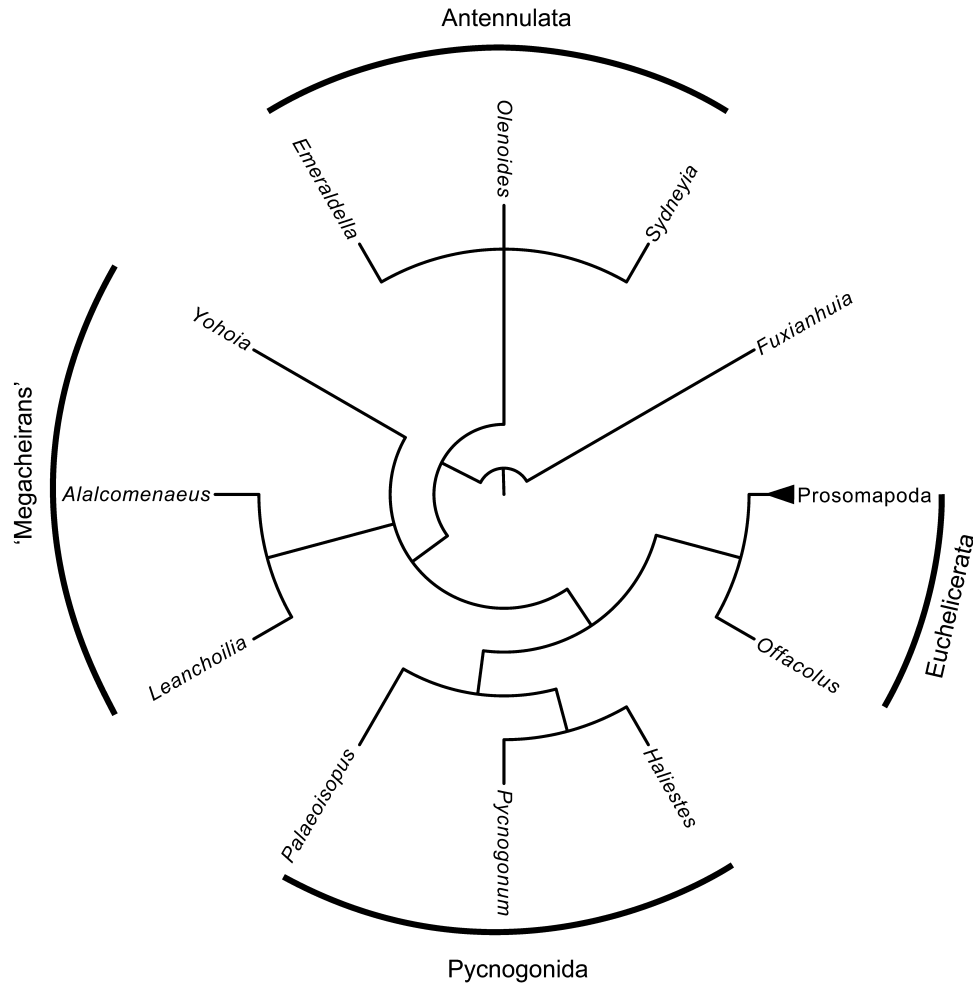

**Figure 7.** Summary cladogram of higher-level relationships retrieved from the phylogenetic analysis. Chelicerata consists of Pycnogonida and Euchelicerata, with megacheirans forming a polytomy on the node below. Trilobites and xenopods form a basal clade which is here considered to represent Antennata. For the full consensus tree see the Supporting information.



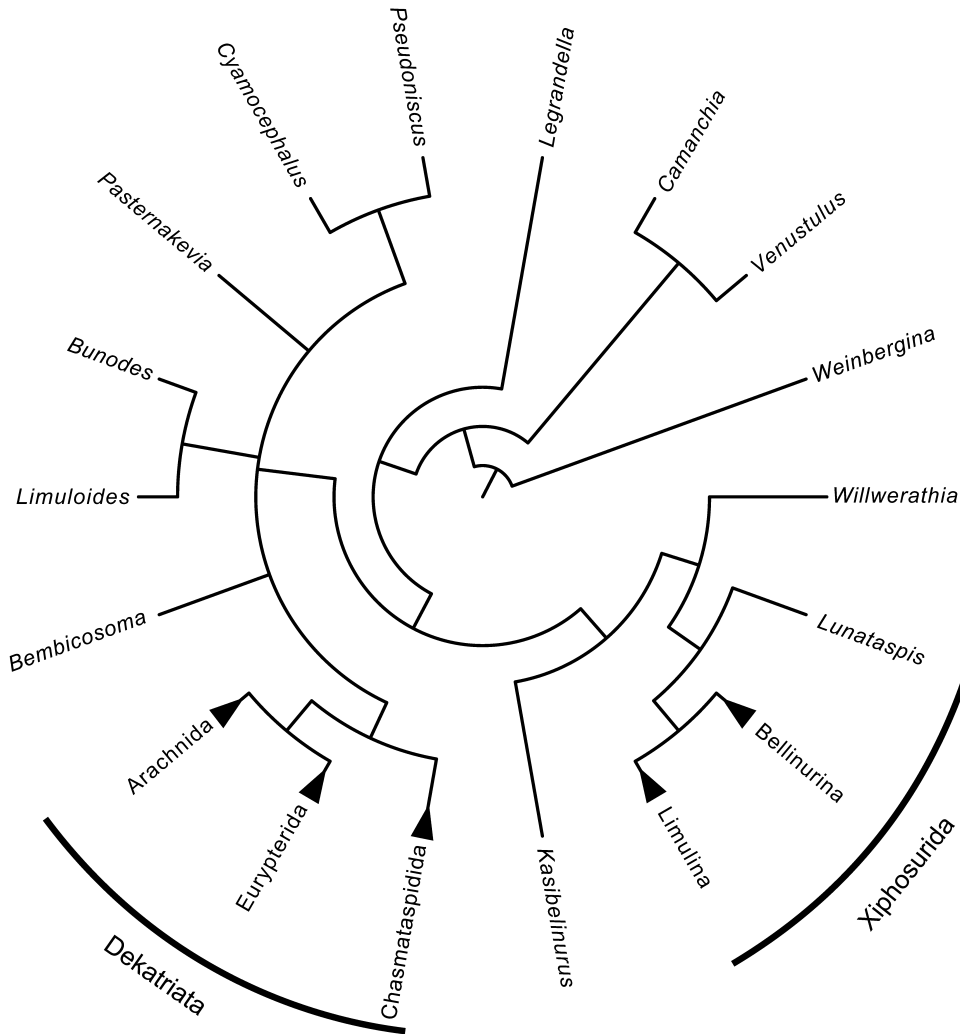

**Figure 8.** Summary cladogram of the internal relationships of Prosomapoda. Arachnids, eurypterids, and chasmataspids form a clade, here termed Dekatriata. Xiphosurans are paraphyletic with respect to Dekatriata, with xiphosurids forming a monophyletic clade of their own. All taxa outside the two labels are synziphosurines, which would here be polyphyletic. For the full consensus tree see the Supporting information.

and trunk region in these taxa limit their use in polarizing characters relating to these regions in euchelicerates, although *Palaeoisopus* does retain a segmented abdomen and telson. Instead the sister group to Chelicerata informs on these characteristics, and in this analysis megacheirans resolve in that position. It is unclear whether they form a clade or a grade, however, as a clade consisting of *Alalcomenaeus* and *Leanchoilia* forms a polytomy with *Yohoia* and Chelicerata. *Olenoides*, *Emeraldella*, and *Sidneyia* form the basalmost clade in the analysis with an unresolved internal topology. While this could be consistent with the arachnomorph hypothesis, following the argumentation of Scholtz & Edgecombe (2005) for trilobites as stem-mandibulates results in this

clade being interpreted as representing Antennulata. If the tree is rooted on the pycnogonids, as it would be if the Cormogonida hypothesis were true, then the topology rotates with euchelicerates forming the sister group to a clade with a topology consisting of *Fuxianhuia* as the sister taxon to Antennulata with megacheirans forming a basal polytomy. Irrespective, the internal topology of Euchelicerata does not change. *Offacolus* is shown to be the most basal known euchelicerate, resolving as the sister taxon to a clade comprising euchelicerates that have lost the exopods on prosomal appendages II–V. This clade is here termed Prosomapoda *nom. nov.*, and includes xiphosurans (*sensu lato*), chasmataspids, eurypterids, and arachnids.

### A REVISED SYSTEM – XIPHOSURAN PARAPHYLY

Xiphosura, as presently defined, is shown to be paraphyletic (Fig. 8). Xiphosurids do indeed form a monophyletic clade, although synziphosurines represent polyphyletic aquatic chelicerates that resolve at the base of a number of well-supported chelicerate clades. *Weinbergina*, *Venustus* Moore in Moore *et al.* 2005b, *Camanchia* Moore *et al.*, 2011 and *Legrandella* Eldredge, 1974, taxa that have always been considered to be closely related (either placed within the now defunct Weinberginidae or compared directly with the morphology of *Weinbergina*), form a grade at the base of Prosomapoda nom. nov. There are a number of characters that support the position of these taxa and the fact they form a grade rather than a clade.

#### SEGMENT ARTICULATIONS

Lamsdell (2011) proposed two pieces of evidence that suggested synziphosurines formed a paraphyletic grade to a group inclusive of xiphosurids, eurypterids, chasmataspidids, and arachnids, rather than being confined to the xiphosurid stem lineage. One of these lines of reasoning is no longer valid but the other strongly attests to the non-monophyly of Xiphosura. The articulation between the thoracetron and the carapace in xiphosurids is formed by an anterior extension of the articulating facet along the axis into a pseudo half-ring (Fig. 9A), and this type of articulation is vestigial in the tergites of the fused thoracetron of *Lunataspis aurora* (Fig. 9B). Lamsdell (2011) followed Eldredge (1974) and Eldredge & Plotnick (1974) in suggesting that this type of articulation was common among the synziphosurines, and hypothesized that *Weinbergina opitzi* Richter & Richter, 1929 and *Kasibelinurus amicornum* Pickett, 1993, which possess simple articulating facets without the pseudo half-ring extension, may in fact be ancestral to all the more derived chelicerates as opposed to just

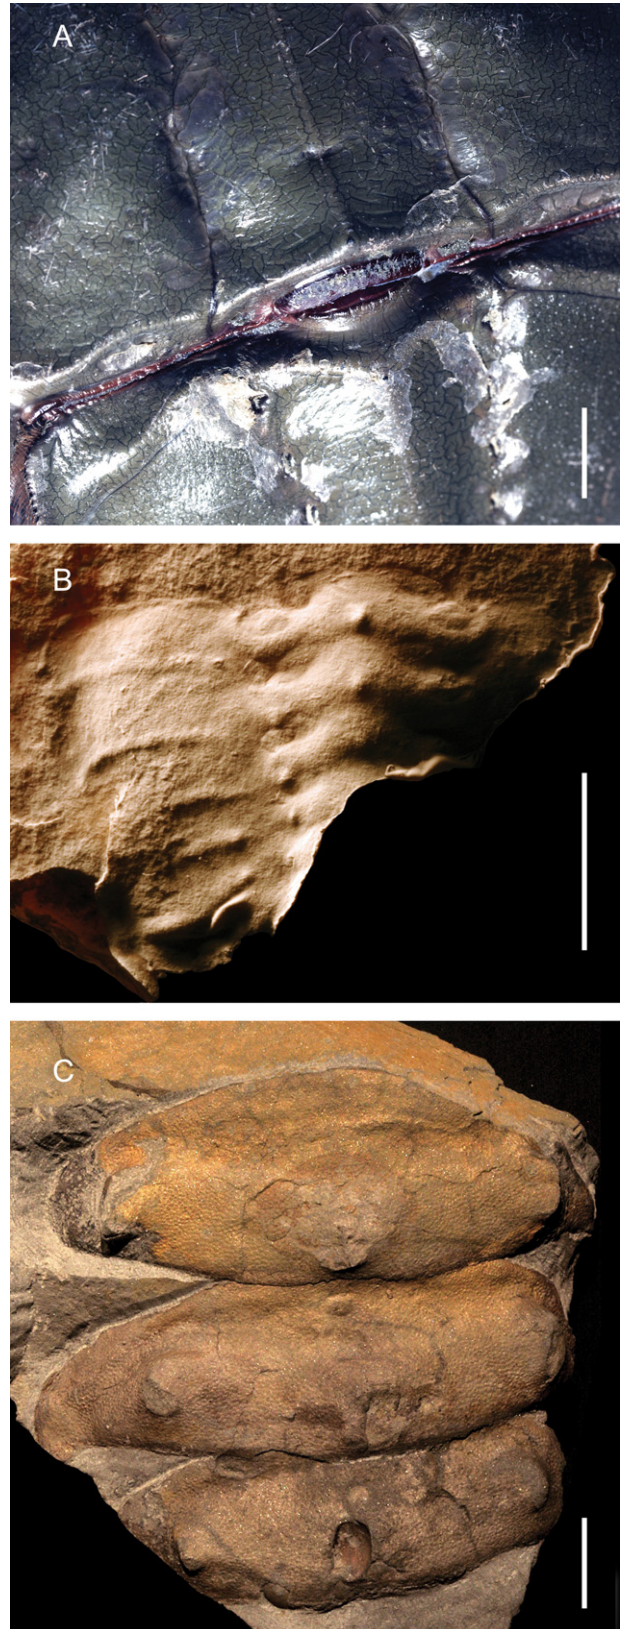

**Figure 9.** A, *Limulus polyphemus* Linnaeus, 1758 from the Recent of North America. Specimen positioned to show the prosoma/opisthosoma joint, with its axially extending articulation. B, *Lunataspis aurora* Rudkin, Young & Nowlan, 2008 from the Upper Ordovician (Katian) of Manitoba, Canada. Rubber mould of specimen MM I-3990, showing the axial extension of the articulating facet on each segment. Image courtesy of Graham Young. C, *Willwerathia laticeps* (Størmer, 1936) from the Lower Devonian (Emsian) of Willwerath, Germany. Specimen PWL 2011/5690-LS, showing a similar anterior extension of the articulating facets. Image courtesy of Markus Poschmann. Scale bars = 10 mm.



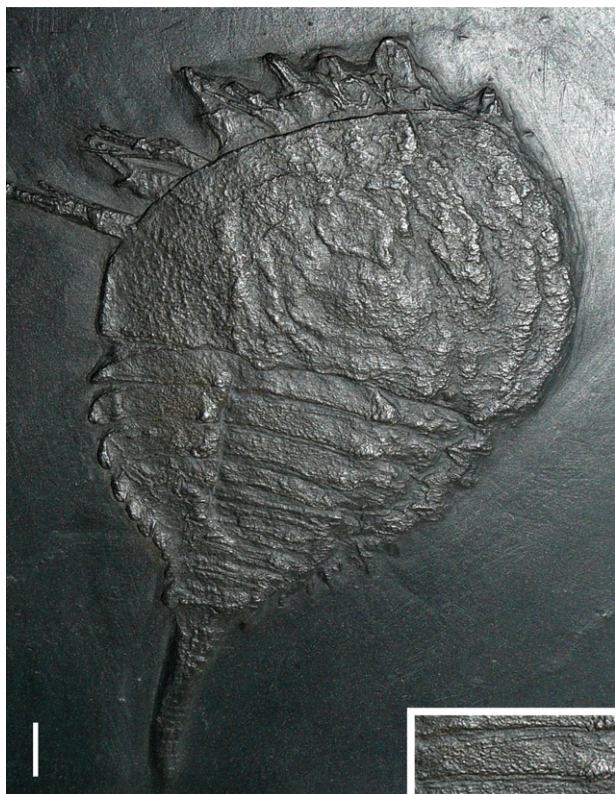

**Figure 10.** *Weinbergina opitzi* Richter & Richter, 1929 from the Lower Devonian (Emsian) of Bundenbach, Germany. Holotype specimen SMF VIII 7a, showing a flat articulating facet at the anterior of each tergite. Scale bar = 10 mm.

Xiphosurida. With the exception of *Willwerathia laticeps* (Størmer, 1936) (Fig. 9C), however, no synziphosurine demonstrably possesses any form of pseudo half-ring. Instead an articulating facet is present as in *Weinbergina opitzi* (Fig. 10). Furthermore, possessing an articulating facet is shown to be the plesiomorphic state, being recognizable in megacheirans such as *Leancoilia superlata* Walcott, 1912, artiopods such as *Emeraldella brocki*, and a number of aglaspidids including *Aglaspis spinifer*, *Aglaspis barrandei* Hall, 1862, and *Chlupacaris dubia* Van Roy, 2006. Therefore, the retention of an articulating facet in synziphosurines provides no information regarding their position on the chelicerate tree.

#### SOMITE VII

The second line of enquiry focuses on the appendages of somite VII. It has been suggested that this appendage pair is the origin of the xiphosurid chilaria (Dunlop & Webster, 1999), the eurypterid metastoma (Størmer, 1934), and the scorpion sternum (Jeram, 1998), and if so then all of these structures must be

treated as transformational homologues. The chilaria have been shown through work on development in *Limulus* to comprise the appendages of somite VII (Farley, 2010), whilst scorpions possess an embryonic limb pair anterior to the remaining trunk limbs (Brauer, 1895) that is not expressed in adults. Its eventual fate is unknown, but it is conceivable that the pair could proceed to form the sternum. Evidence for the appendicular nature of the eurypterid metastoma stems from the presence of paired muscle scars on many well-preserved specimens and a possible fused median suture in others. If one accepts the homology of these structures, the fully pediform appendage VII of *Weinbergina* (as shown by Stürmer & Bergström, 1981 and Moore *et al.*, 2005a) needs to be accounted for. There is the possibility that the pediform endopod is an autapomorphy of *Weinbergina*, especially given the flap-like structures in the same position on *Offacolus kingi*, although the appendages of *Offacolus* more closely resemble exopods (bearing some similarity to the exopods of megacheirans) and may represent part of an adaption to a more nektonic mode of life. More likely is that the pediform limb is a plesiomorphic character, irrespective of uncertainty about the euchelicerate outgroup, and this is the case in the new analysis. A fully pediform appendage VII is found in pycnogonids, trilobites, and megacheirans, along with other mooted ancestral taxa such as *Sidneyia inexpectans* and *Emeraldella brocki*. Therefore, for *Weinbergina* to resolve at the base of a monophyletic Xiphosura, the endopod of appendage VII would have to be independently reduced in both the lineage leading to xiphosurids and that leading to eurypterids, chasmataspidids, and arachnids. A more parsimonious model of evolution is for the fully pediform appendages of *Weinbergina* to be reduced into the chilaria through the synziphosurine lineage (some of which, such as *Venustulus waukeshaensis* Moore in Moore *et al.*, 2005b, clearly only have five post-chelicerate pediform appendages) that were retained in xiphosurids but fused to form the metastoma in eurypterids and chasmataspidids.

#### CHELICERAE

There are also a number of further characteristics, not explored by Lamsdell (2011), that suggest xiphosuran paraphyly. One of the more conclusive is elongation of the cheliceræ, a condition found in *Offacolus kingi* (Sutton *et al.*, 2002) and in *Weinbergina opitzi* as shown by the manner in which the cheliceræ project beyond the anterior carapace margin (Moore *et al.*, 2005a: fig. 4). The cheliceræ are reduced to their usual, shorter length in the synziphosurines *Venustulus waukeshaensis* and *Camanchia grovensis*



Moore *et al.*, 2011 as well as the xiphosurids. Short chelicerae are also known in the chasmataspidid *Loganamaraspis dunlopi* Tetlie & Braddy, 2004 and in all eurypterids where preserved except for the pterygotids, the enlarged chelicerae of which represent an independently derived condition. Budd & Legg (2011) have suggested that the elongate chelicerae are derived from multi-annulate antenniform appendages such as those of *Sidneyia* and *Emeraldella*, but no chelicerae show any sign of possessing more than four segments [with the possible exception of the chelifores of *Palaeoisopus* which according to Bergström, Stürmer & Winter (1980) comprise five articles] or being formed from fused annulations. Instead, the increase in length is derived from the peduncle (the first cheliceral segment, which is bipartite in pycnogonids and *Offacolus*) or the segment bearing the fixed ramus of the cheliceral claw. This state is also shared with the fossil pycnogonids *Palaeoisopus problematicus* and *Haliestes dasos*, which have large, robust chelifores similar in width to the walking limbs and of equal length to the palps, while a number of megacheiran taxa also possess great appendages composed of few articles where the peduncle and first armature-bearing segment are elongated (Haug *et al.*, 2012b). Irrespective of whether elongate chelicerae have a great appendage or antenniform origin, it is clear that the condition is plesiomorphic for Euchelicerata and so a similar situation arises as with the form of appendage VII. For *Weinbergina* to be positioned at the base of a monophyletic Xiphosura, reduction of the chelicerae would be required to have occurred in both the xiphosurid stem and the lineage leading to arachnids, eurypterids, and chasmataspidids. Therefore, it is more likely that the precursors to *Weinbergina* diverged from the main chelicerate lineage prior to the divergence of the xiphosurid clade.

#### MARGINAL RIM

*Weinbergina*, *Venustulus*, *Bunodes*, and *Camanchia* also all lack a carapace marginal rim, something that is present in all other synziphosurines, xiphosurids, and eurypterids, even if it is deflected ventrally as in most xiphosurids. The lack of a carapace marginal rim is likely to be the plesiomorphic condition, it being absent from most other arthropods (including *Offacolus*) with the notable exception of trilobites and aglaspidids.

#### TERGOPLLEURAE

Of a similar nature is the degree of tergopleural overlap. In *Offacolus*, along with *Weinbergina*, *Venustulus*, and *Camanchia*, the tergopleurae overlap

one another, as is the condition for the majority of artiopods and megacheirans (with the exception of *Yohoia*) and trilobites (the tergopleurae of which abut each other). Among the remaining synziphosurines, however, the tergopleurae are separated laterally to form a 'gape'; it is this condition that is also present in *Yohoia*. Eurypterids, with their reduced epimera, also exhibit a lateral gape, as do xiphosurids that retain the epimera on the lateral margins of the thoracetrone despite the fusion of the tergites. This again would be consistent with xiphosurids sharing closer common ancestry with eurypterids than with some of the synziphosurines that were previously meant to comprise part of the xiphosurid stem.

#### XIPHOSURA SENSU STRICTO

*Kasibelinurus* and *Willwerathia* resolve as a paraphyletic grade in a clade with xiphosurids, and are the only two synziphosurines in the analysis that fall within the revised Xiphosura. Xiphosura *sensu stricto* is defined by the possession of a cardiac lobe that extends onto the anterior half of the carapace and potentially the possession of ophthalmic ridges that curve towards the carapace centre anteriorly and merge with a central cardiac ridge to form a double arch (or 'm') shape; although *Kasibelinurus amicornum* does not appear to possess this ophthalmic ridge morphology the dorsal carapace of the holotype is flattened and these structures may have not been preserved, while other species currently assigned to *Kasibelinurus* [such as *Kasibelinurus (?) randalli* (Beecher, 1902)] clearly show the double arch configuration. *Willwerathia* is placed as the sister taxon to Xiphosurida despite its unusual morphology, united with the order by its possession of an axial anterior extension to the articulating facet on each tergite.

#### BUNODIDS AND PSEUDONISCIDS

Xiphosura *sensu stricto* is itself the sister group to a clade named Planaterga nom. nov. consisting of bunodids, pseudoniscids, chasmataspidids, eurypterids, and arachnids, a group defined at its base by the loss of the distinctive axial and subaxial nodes found on other synziphosurines. Chasmataspidids, eurypterids and arachnids are further defined in their ground plan by the possession of a 13-segmented opisthosoma (although this is then reduced in arachnids) and form a monophyletic clade, which is here named Dekatriata nom. nov. The basal node of Planaterga nom. nov. consists of a polytomy of taxa currently assigned to Pseudoniscidae and Bunodidae. *Bunodes* and *Limuloides* resolve as sister taxa, as do *Pseudoniscus* and *Cyamocephalus*, but neither family is retrieved in its entirety as unequivocally monophyletic. Both are

united with Dekatriata nom. nov., however, in lacking axial nodes (with the exception of *Limuloides*) and in possessing an opisthosoma that has its widest point at the third or fourth tergite. Furthermore, the pseudoniscids and Dekatriata nom. nov. both show a predilection for possessing a carapace that is at least equal in length and width and an increasing lateral gape in the tergopleurae posteriorly. *Bunodes* and *Bembicosoma*, meanwhile, possess a distinct tuberculate ornament that is similar to that found in chasmataspidids. At present there is not enough data to indicate whether pseudoniscids and bunodids form a paraphyletic grade leading to Dekatriata nom. nov. or if they are themselves a diverse and previously unrecognized order of chelicerates. Either way, the recognition that they have a closer relationship to chasmataspidids, eurypterids, and arachnids than xiphosurids is important and has ramifications for the evolution of the group; the presence of dorsally visible reduced pre-opercular tergites in chasmataspidids, pseudoniscids, bunodids, and *Willwerathia*, for example, means that the tergite of somite VII was reduced independently in Xiphosurida and Dekatriata nom. nov. Although it cannot be seen in *Weinbergina*, *Camanchia*, or *Venustulus*, *Legrandella* clearly shows that while the tergite of somite VII was already partially reduced it still retained its identity as a fully expressed opisthosomal tergite with tergopleurae prior to its reduction in each lineage.

#### HIGHER SYSTEMATICS

With phylogenetic analysis supporting the contention that Xiphosura is paraphyletic it is considered sufficient justification to alter the systematics of Euchelicerata to reflect this revised system. Systematics (including taxonomy) should always aim to accurately represent phylogeny whenever possible, and as such formal names should only be applied to monophyletic groups. Xiphosura is therefore restricted to xiphosurids and those synziphosurines that form the stem lineage within the clade exclusive of Planaterga nom. nov.; in this analysis that comprises *Willwerathia* and *Kasibelinurus*, although further synziphosurine taxa should be restudied to ascertain whether they fall within or outside of Xiphosura. Rather than muddy the taxonomic waters by introducing a swathe of monotypic families (or orders!), synziphosurines that fall outside of Xiphosura are at present left unranked, although a number of more inclusive clades are named in order to aid discussion of their relationships. This will probably change through time as polytomies such as those of the bunodids and pseudoniscids are resolved and as more taxa are described. Being offshoots of the main chelicerate lineage with a ghost range of at least 45 Myr it is certain that taxa such as

*Weinbergina* and *Legrandella* are actually representatives of at least marginally successful clades of marine chelicerates that extend as far back as the Ordovician, even if species diversity remained at a minimum throughout their history. It is likely that further studies of Ordovician localities, as well as Silurian and Devonian strata, will reveal both xiphosurids and 'synziphosurines'.

### TAXONOMY

#### CHELICERATA HEYMONS, 1901

*Diagnosis:* Arthropoda with the preoral appendages of somite I modified into chelate grasping appendages.

*Included taxa:* EUHELICERATA Weygoldt & Paulus, 1979; PYCNOGONIDA Latreille, 1810 [= ARACHNOPODA Dana, 1853].

#### PYCNOGONIDA LATREILLE, 1810 [= ARACHNOPODA DANA, 1853]

*Diagnosis:* Chelicerata with all body segments retaining dorsal differentiation; external proboscis developed around mouth; appendage III modified into ovigers; abdomen generally reduced.

#### EUHELICERATA WEYGOLDT & PAULUS, 1979

*Diagnosis:* Chelicerata with the body divided into a prosoma, mesosoma, and metasoma; prosoma consisting of six appendage pairs united dorsally by a carapace; mesosomal appendages modified into flap-like opercula.

*Included taxa:* *Offacolus* Orr *et al.*, 2000; PROSOMAPODA nom. nov.

#### PROSOMAPODA NOM. NOV.

*Etymology:* From the term *prosoma*, referring to the anterior chelicerate tagma, and the Greek *podi* (foot).

*Diagnosis:* Euchelicerata with prosomal appendages II–V lacking exopods in the adult instar.

*Included taxa:* ?*Andarella* Moore, McKenzie & Lieberman, 2007; ?*Borchgrevinkium* Novojilov, 1959; *Camanchia* Moore, Briggs, Braddy & Shultz, 2011; *Legrandella* Eldredge, 1974; *Venustulus* Moore in Moore *et al.* 2005b; *Weinbergina* Richter & Richter, 1929; PLANATERGA nom. nov.; XIPHOSURA Latreille, 1802 [= MEROSTOMATA Dana, 1852].

*Remarks:* Prosomapoda incorporates all euchelicerates that have uniramous prosomal appendages in

the adult instar apart for the flabellum found on appendage VI. This node-based definition allows for taxa to be incorporated or excluded from Prosomapoda in the future without further altering the taxonomy.

XIPHOSURA LATREILLE, 1802  
[= MEROSTOMATA DANA, 1852]

*Diagnosis:* Prosomapoda with a partially reduced tergite of somite VII; appendages of somite VII reduced to chilaria; opisthosoma broadest anteriorly; cardiac lobe extends onto anterior half of carapace; ophthalmic ridges merge anteriorly with median ridge to form double arch.

*Included taxa:* *Kasibelinurus* Pickett, 1993; ?*Maldybulakia* Tesakov & Alekseev, 1998 [= *Lophodesmus* Tesakov & Alekseev, 1992]; *Willwerathia* Størmer, 1969; XIPHOSURIDA Latreille, 1802.

*Remarks:* Merostomata was originally proposed by Dana (1852) as consisting solely of Xiphosura but later expanded to include Eurypterida (Woodward, 1866–1878). Eurypterida being closer related to Arachnida than Xiphosura necessitates their removal from Merostomata and results in Merostomata being a junior synonym of Xiphosura.

*Elleria* Raymond, 1944 and *Kiaeria* Størmer, 1934 probably have a fused thoracetron and are therefore classified as xiphosurids. *Maldybulakia* has been considered to show similarity to *Willwerathia* and so is tentatively included within Xiphosura.

XIPHOSURIDA LATREILLE, 1802

*Diagnosis:* Xiphosura with the tergites of somites VIII–XIV dorsally fused into a thoracetron.

PLANATERGA NOM. NOV.

*Etymology:* From the Latin *plana* (level) and *terga* (back), in reference to the lack of axial nodes that characterizes the clade's ground plan.

*Diagnosis:* Prosomapoda lacking enlarged axial nodes on opisthosomal tergites; genal spines vestigial; opisthosoma broadest at third or fourth tergite; appendages of somite VII reduced; tergite of somite VII beginning to form microtergite.

*Included taxa:* *Bembicosoma* Laurie, 1899; ?*Bunaia* Clarke, 1919; *Bunodes* d'Eichwald, 1854 [= *Exapinurus* Nieszowski, 1859]; *Cyamocephalus* Currie, 1927; *Limuloides* Woodward, 1865 [= *Hemiaspis* Woodward, 1864]; *Pasternakevia* Selden & Drygant,

1987; *Pseudoniscus* Nieszowski, 1859 [= *Neolimulus* Woodward, 1868]; DEKATRIATA *nom. nov.*

*Remarks:* It is currently equivocal as to whether pseudoniscids and bunodids form a clade of their own or are paraphyletic in regard to Dekatriata.

This clade is defined as incorporating all taxa that resolve along the arachnid stem, exclusive of Xiphosurida and those taxa that diverge from the chelicerate lineage prior to the divergence of Xiphosurida.

DEKATRIATA NOM. NOV.

*Etymology:* From the Greek *dekatria* (thirteen), referring to the 13-segmented opisthosoma that defines the clade's ground plan.

*Diagnosis:* Planaterga with a total of 19 somites; opisthosoma plesiomorphically consisting of 13 segments; appendages of somite VII fused into plate.

*Included taxa:* CHASMATASPIDIDA Caster & Brooks, 1956 [= DIPLOASPIDA Simonetta & Delle Cave, 1978]; SCLEROPHORATA Kamenz, Staude & Dunlop, 2011.

*Remarks:* The character used to define this clade, the presence of 13 segments in the opisthosoma, is considered to be present in the arachnid groundplan (Dunlop & Webster, 1999). Although the number of segments in other arachnid groups is often fewer, this could be achieved either through suppression of the VII somite or a pedomorphic reduction of segments (see Dunlop, 1998 for a similar concept to this but based on arachnid polyphyly).

CHASMATASPIDIDA CASTER & BROOKS, 1956

[= DIPLOASPIDA SIMONETTA & DELLE CAVE, 1978]

*Diagnosis:* Dekatriata with the tergite of somite VII retained as a dorsally visible microtergite; tergites of somites VII–X dorsally fused into a buckler; buckler underlain by ventral plate.

SCLEROPHORATA KAMENZ, STAUDE & DUNLOP, 2011

*Diagnosis:* Dekatriata possessing sclerophores as part of a spermatophore-mediated sperm transfer system

*Included taxa:* ARACHNIDA Lamarck, 1801; EURYPTE- RIDA Burmeister, 1843 [= GIGANTOSTRACA Haeckel, 1866; = CYRTOCTENIDA Størmer & Waterston, 1968].

*Remarks:* It is possible that Sclerophorata and Dekatriata are synonyms, but until more detail of the



genital structures of chasmataspidids is known this clade is considered to comprise solely Arachnida and Eurypterida.

EURYPTERIDA BURMEISTER, 1843

[ = GIGANTOSTRACA HAECKEL, 1866]

[ = CYRTOCTENIDA STØRMER & WATERSTON, 1968]

*Diagnosis:* Sclerophorata with the appendages of somites VIII and IX fused into a genital operculum.

ARACHNIDA LAMARCK, 1801

*Diagnosis:* Sclerophorata with reduced head shield lacking cardiac lobe; anteroventrally directed mouth; proventricular crop lost; adult instars without appendages of the first opisthosomal segment.

*Remarks:* A monophyletic Arachnida is one of the most strongly supported clades within the analysis, even without characters traditionally considered to unite the group that have been suggested to represent convergences towards a terrestrial mode of life (Dunlop & Webster, 1999). Dunlop *et al.* (2012) recently reviewed the cephalic tagmosis in solifuges, acariformes, schizomids, and palpigrales, which have the prosoma separated anteriorly into a propeltidium consisting of the first four appendage pairs, that they suggested may be homologous to the 'euarthropod head' (see Chen, 2009). Dunlop *et al.* suggest that a divided prosomal region consisting of a propeltidium and two separate segments bearing walking limbs may be plesiomorphic for arachnids. This would, however, necessitate a separate acquisition of the prosoma in each of the aquatic euchelicerate groups. The solifuge *Galeodes armeniacus* Birula, 1929 was included in the current analysis with its head composition coded polymorphically as both 1 + 3 and 1 + 5, representing the fact that it possesses a propeltidium as a subdivision of the prosoma. The results, however, show that the plesiomorphic condition for arachnids is a fully consolidated prosoma, and the division into propeltidium is a derived state (or possibly a reversal). Alternatively coding *G. armeniacus* as only possessing a 1 + 3 head did not change the tree topology, or the arachnid ground plan, in any way.

## CONCLUSIONS

The redefinition of Xiphosura requires that we rethink the patterns and timing of early chelicerate evolution. With synziphosurines scattered across the chelicerate tree, as either part of the stem lineage to all other euchelicerates except *Offacolus*, the xiphosurid stem lineage, or even the stem lineage of a clade

comprising chasmataspidids, eurypterids, and arachnids, it is clear that the phylogenetic diversity of Palaeozoic aquatic chelicerates as previously defined has been underestimated. Furthermore, the winnowing of Xiphosura *sensu stricto* also indicates that, except for the proliferation of Bellinurina in the Carboniferous, the clade has always had a relatively low diversity. The new proposed topology of the chelicerate tree also results in large ghost ranges for all of the synziphosurine taxa. While further studies of Ordovician strata in Europe and North America will probably reveal more aquatic chelicerate taxa that may be recognizable as the ancestors of the Silurian and Devonian synziphosurines, attention should also turn to the Gondwanan provinces. Anderson (1996) suggested that the appearance of seemingly primitive synziphosurines during the Devonian was the result of their radiation from Gondwanan refugia, while *Legrandella* is itself from Bolivia. Lamsdell, Hoşgör & Selden (2012) suggested a Gondwanan origination for eurypterids, the constituent clades of which also all have ghost ranges extending into at least the Katian. Both xiphosurids and synziphosurines have been discovered from the Ordovician of Morocco (Van Roy *et al.*, 2010) and so it is possible that the earliest euchelicerates may be found outside of Laurentia. It is worth noting that megacheirans have a near global distribution, having been recorded from North America (e.g. Briggs & Collins, 1999; Haug *et al.*, 2012b), China (e.g. Chen *et al.*, 2004; Liu, Hou & Bergström, 2007), and Australia (Edgecombe, García-Bellido & Paterson, 2011), and if they are in fact the sister group to Chelicerata then the potential remains for chelicerates to have originated anywhere within this range.

While the balance of evidence presented herein indicates that Xiphosura as has previously been defined is paraphyletic, further discoveries are needed to help elucidate the associations of some of the more problematic taxa (such as *Andarella* and *Borchgrevinkium*) and resolve the nature of the relationship between bunodids and pseudoniscids. A restudy of these problematic Palaeozoic 'synziphosurines' may provide further information on their relationships, while similar cladistic work should be carried out on the xiphosurids, which have never received a proper phylogenetic treatment. The rearrangement of xiphosurans in a paraphyletic grade also opens up the possibility of the existence of synziphosurines that retain further plesiomorphic characteristics or share derived characters with Dekatriata. While a *Weinbergina*-like form with biramous prosomal limbs would previously have been difficult to reconcile with the previous model of chelicerate evolution, and a pseudoniscid or bunodid with a genital appendage would have been deeply

unsettling, the discovery of either would now be almost expected given the revised relationships set out in this study.

#### A NOTE ON *DIBASTERIUM*

Soon after the acceptance of this paper, Briggs *et al.* (2012) described a new synziphosurine from the Silurian of Herefordshire. This remarkable creature, named *Dibasterium durgae*, closely resembles the hypothesized 'Weinbergina-like form with biramous prosomal appendages' postulated in the conclusion of the present paper. Briggs *et al.* also include *Dibasterium* in a phylogenetic analysis that retrieves the traditional Xiphosura (synziphosurines and Xiphosurida) as monophyletic along with *Offacolus*. Four apparent synapomorphies are cited as supporting this clade, although one of them (character 22 – raised axial region) is simply an expression of the arthropod axis as noted here. The status of two of the remaining synapomorphies, character 77 (chelate walking limbs) and character 88 (seventh appendage pair incorporated into the cephalic tagma), is also uncertain as chelate prosomal appendages are known from *Chasmataspis* (which was not included in the analysis) while the authors did not account for the probability of the eurypterid metastoma being homologous to the seventh appendage pair. This leaves a single synapomorphy, character 38 (an elongate telson), a subjective character that is sensitive to relative changes in both telson and opisthosomal length. Although all of the potential xiphosuran taxa sampled possess elongate telsons, a large number of unsampled synziphosurines do not, and so its suitability as a synapomorphy for the clade is dubious. Synziphosurines and Xiphosurida are united by characters 85 (appendage VI modified into a pusher), 89 (appendage VII reduced and spinose along margin) and 90 (appendage VII as chileria); however, characters 89 and 90 are actually re-expressions of one another, and as such one should be removed. This results in two potential synapomorphies for the clade, both of which were taken into account in the analysis presented in herein. Therefore, while the excellent description and analysis of *Dibasterium* by Briggs *et al.* does provide new information about character evolution among basal chelicerates it does not provide any new support for xiphosuran monophyly.

#### ACKNOWLEDGEMENTS

Ewa Krzemińska (Museum of the Institute of Systematics and Evolution of Animals), Dave Marshall (Ichon/Palaeocast), Markus Poschmann (Generaldirektion Kulturelles Erbe Rheinland-Pfalz), and Graham Young (Manitoba Museum) are thanked for

providing images of specimens. Paul Selden (University of Kansas) provided support and equipment that allowed for the execution of this study. Martin Stein (University of Copenhagen) is thanked for many discussions on arthropod morphology. Bruce Lieberman (University of Kansas) read and commented on an earlier version of the manuscript. Thanks are due to Peter Van Roy (Ghent University), Jason Dunlop (Museum für Naturkunde), and an anonymous reviewer for providing comments that greatly improved the quality of the manuscript.

#### REFERENCES

- Anderson LI.** 1996. Taphonomy and taxonomy of the Palaeozoic Xiphosura. D. Phil. Thesis, University of Manchester.
- Anderson LI.** 1999. A new specimen of the Silurian synziphosurine arthropod *Cyamocephalus*. *Proceedings of the Geologists' Association* **110**: 211–216.
- Anderson LI, Poschmann M, Brauckmann C.** 1998. On the Emsian (Lower Devonian) arthropods of the Rhenish Slate Mountains: 2. The synziphosurine *Willwerathia*. *Paläontologische Zeitschrift* **72**: 325–336.
- Anderson LI, Selden PA.** 1997. Opisthosomal fusion and phylogeny of Palaeozoic Xiphosura. *Lethaia* **30**: 19–31.
- Beecher CE.** 1901. Discovery of eurypterid remains in the Cambrian of Missouri. *American Journal of Science* **12**: 364.
- Beecher CE.** 1902. Note on a new xiphosuran from the Upper Devonian of Pennsylvania. *American Geologist* **29**: 143–146.
- Bergström J.** 1971. *Paleomerus* – merostome or merostomoid. *Lethaia* **4**: 393–401.
- Bergström J.** 1975. Functional morphology and evolution of xiphosurids. *Fossils and Strata* **4**: 291–305.
- Bergström J, Stürmer W, Winter G.** 1980. *Palaeoisopus*, *Palaeopantopus* and *Palaeothea*, pycnogonid arthropods from the Lower Devonian Hunsrück Slate, West Germany. *Paläontologische Zeitschrift* **54**: 7–54.
- Berlese A.** 1904. Acari nuovi III. *Redia* **2**: 10–32.
- Birula AA.** 1929. Über *Galeodes armeniacus* n. sp. *Zoologischer Anzeiger* **84**: 273–282.
- Boxshall GA.** 2004. The evolution of arthropod limbs. *Biological Reviews* **79**: 253–300.
- Brauer A.** 1895. Beiträge zur Kenntnis der Entwicklungsgeschichte des Skorpiones, II. *Zeitschrift für Wissenschaftliche Zoologie* **59**: 351–433.
- Bremer K.** 1994. Branch support and tree stability. *Cladistics* **10**: 295–304.
- Briggs DEG, Bruton DI, Whittington HB.** 1979. Appendages of the arthropod *Aglaspis spinifer* (Upper Cambrian, Wisconsin) and their significance. *Palaeontology* **22**: 167–180.
- Briggs DEG, Collins D.** 1988. A middle Cambrian chelicerate from Mount Stephen, British Columbia. *Palaeontology* **31**: 779–798.
- Briggs DEG, Collins D.** 1999. The arthropod *Alalcomenaeus cambricus* Simonetta, from the Middle Cambrian Burgess Shale of British Columbia. *Palaeontology* **42**: 953–977.

- Briggs DEG, Fortey RA. 1989.** The early radiation and relationships of the major arthropod groups. *Science* **246**: 241–243.
- Briggs DEG, Fortey RA, Wills MA. 1992.** Morphological disparity in the Cambrian. *Science* **256**: 1670–1673.
- Briggs DEG, Siveter DJ, Siveter DJ, Sutton MD, Garwood RJ, Legg DA. 2012.** Silurian horseshoe crab illuminates the evolution of arthropod limbs. *Proceedings of the National Academy of Sciences of the United States of America* **109**: 15702–15705.
- Broili F. 1928.** Crustaceenfunde aus dem rheinischen Unterdevon. *Sitzungsberichte der Bayerischen Akademie der Wissenschaften, Mathematisch-Naturwissenschaftliche Abteilung* **1928**: 197–201.
- Budd GE. 2002.** A palaeontological solution to the arthropod head problem. *Nature* **417**: 271–275.
- Budd GE, Legg DA. 2011.** Up the spout? Climbing up the chelicerate stem-group. *The Palaeontological Association 55th Annual Meeting, Programme and Abstracts*, 17.
- Burmeister H. 1843.** *Die Organisation der Trilobiten, aus ihren lebenden Verwandten entwickelt; nebst systematischen Uebersicht aller zeither beschriebenen Arten*. Berlin: G. Reimer, 1–148.
- Caster KE, Brooks HK. 1956.** New fossils from the Canadian-Chazan (Ordovician) hiatus in Tennessee. *Bulletins of American Palaeontology* **36**: 157–199.
- Chen J. 2009.** The sudden appearance of diverse animal body plans during the Cambrian explosion. *The International Journal of Developmental Biology* **53**: 733–751.
- Chen J, Edgecombe GD, Ramsköld L, Zhou G. 1995.** Head segmentation in early Cambrian *Fuxianhuia*: implications for arthropod evolution. *Science* **268**: 1339–1343.
- Chen J, Waloszek D, Maas A. 2004.** A new ‘great-appendage’ arthropod from the Lower Cambrian of China and homology of chelicerate chelicerae and raptorial anteroventral appendages. *Lethaia* **37**: 3–20.
- Clarke JM. 1919.** *Bunaia woodwardi*, a new merostome from the Silurian waterlimes of New York. *Geological Magazine* **6**: 531–532.
- Clarke JM, Ruedemann R. 1912.** The eurypterida of New York. *New York State Museum Memoir* **14**: 1–439.
- Cotton TJ, Braddy SJ. 2004.** The phylogeny of arachnomorph arthropods and the origin of the Chelicerata. *Transactions of the Royal Society of Edinburgh: Earth Sciences* **94**: 169–193.
- Currie LD. 1927.** On *Cyamocephalus*, a new synxiphosuran from the Upper Silurian of Lesmahagow, Lanarkshire. *Geological Magazine* **64**: 153–157.
- Daley AC, Budd GE, Caron J-B, Edgecombe GD, Collins D. 2009.** The Burgess Shale anomalocaridid *Hurdia* and its significance for early euarthropod evolution. *Science* **323**: 1597–1600.
- Dana JD. 1852.** Crustacea, pt. I. *United States exploring expedition during the years 1838, 1839, 1840, 1841, 1842. Under the command of Charles Wilkes, U.S.N.C. 13*. Philadelphia: Sherman, 1–685.
- Dana JD. 1853.** Crustacea, pt. II, Arachnoida or Pycnogonida. *United States exploring expedition during the years 1838, 1839, 1840, 1841, 1842. Under the command of Charles Wilkes, U.S.N.C. 14*. Philadelphia: Sherman, 1382–1391.
- Diedrich CJ. 2011.** Middle Triassic horseshoe crab reproduction areas on intertidal flats of Europe with evidence of predation by archosaurs. *Biological Journal of the Linnean Society* **103**: 76–105.
- Dunlop JA. 1998.** The origins of tetrapulmonate book lungs and their significance for chelicerate phylogeny. In: Selden PA, ed. *Proceedings of the 17th European Colloquium of Arachnology, Edinburgh, 1997*. Burnham Beeches: The British Arachnological Society, 9–16.
- Dunlop JA. 2002.** Arthropods from the Lower Devonian Severnaya Zemlya Formation of October Revolution Island (Russia). *Geodiversitas* **24**: 349–379.
- Dunlop JA. 2006.** New ideas about the euchelicerate stem-lineage. In: Deltshv C, Stoev P, eds. *European Arachnology 2005. Acta zoologica bulgarica*, Supplement 1, 9–23.
- Dunlop JA. 2010.** Geological history and phylogeny of Chelicerata. *Arthropod Structure and Development* **39**: 124–142.
- Dunlop JA, Anderson LI, Braddy SJ. 1999.** A new chasmataspid (Chelicerata: Chasmataspida) from the Lower Devonian of the Midland Valley of Scotland. *Transactions of the Royal Society of Edinburgh: Earth Sciences* **89**: 161–165.
- Dunlop JA, Anderson LI, Braddy SJ. 2004.** A redescription of *Chasmataspis laurencii* Caster & Brooks, 1956 (Chelicerata: Chasmataspida) from the Middle Ordovician of Tennessee, USA, with remarks on chasmataspid phylogeny. *Transactions of the Royal Society of Edinburgh: Earth Sciences* **94**: 207–225.
- Dunlop JA, Arango CP. 2005.** Pycnogonid affinities: a review. *Journal of Zoological Systematics and Evolutionary Research* **43**: 8–21.
- Dunlop JA, Braddy SJ. 2001.** Scorpions and their sister-group relationships. In: Fet V, Selden PA, eds. *Scorpions 2001: in memoriam Gary A. Polis*. London: British Arachnological Society, 1–24.
- Dunlop JA, Krüger J, Alberti G. 2012.** The sejugal furrow in camel spiders and acariform mites. *Arachnologische Mitteilungen* **43**: 8–15.
- Dunlop JA, Selden PA. 1997.** The early history and phylogeny of the chelicerates. In: Fortey RA, Thomas RH, eds. *Arthropod relationships*. Systematics Association Special Volumes Series, No. 55. London: Chapman & Hall, 221–235.
- Dunlop JA, Webster M. 1999.** Fossil evidence, terrestrialization and arachnid phylogeny. *The Journal of Arachnology* **27**: 86–93.
- Edgecombe GD, García-Bellido DC, Paterson JR. 2011.** A new leancoiliid megacheiran arthropod from the lower Cambrian Emu Bay Shale, South Australia. *Acta Palaeontologica Polonica* **56**: 385–400.
- Edgecombe GD, Ramsköld L. 1996.** Classification of the arthropod *Fuxianhuia*: response. *Science* **272**: 747–748.
- d’Eichwald CE. 1854.** Die Grauwackenschichten von Liev- und Esthland. *Bulletin de la Société Imperiale des Naturalistes de Moscou* **27**: 1–211.



- Eldredge N. 1974.** Revision of the suborder Synziphosurina (Chelicerata: Merostomata), with remarks on merostome phylogeny. *American Museum Novitates* **2543**: 1–41.
- Eldredge N, Plotnick RE. 1974.** Revision of the pseudoniscine merostome genus *Cyamocephalus* Currie. *American Museum Novitates* **2557**: 1–10.
- Farley RD. 2010.** Book gill development in embryos and first and second instars of the horseshoe crab *Limulus polyphemus* L. (Chelicerata, Xiphosura). *Arthropod Structure and Development* **39**: 369–381.
- Farris JS, Albert VA, Källersjö M, Lipscomb D, Kluge AG. 1996.** Parsimony jackknifing outperforms neighbour-joining. *Cladistics* **12**: 99–124.
- Felsenstein J. 1985.** Confidence limits on phylogenies: an approach using the bootstrap. *Evolution* **39**: 783–791.
- Fisher DC. 1984.** The Xiphosurida: archetypes of bradytely? In: Eldredge N, Stanley SM, eds. *Living fossils*. Berlin: Springer, 196–212.
- Flessa KW, Powers KV, Cisne JL. 1975.** Specialization and evolutionary longevity in the Arthropoda. *Paleobiology* **1**: 71–81.
- Flower R. 1969.** Merostomes from a Cotter horizon of the El Paso Group. *New Mexico Bureau of Mines and Mineral Resources Memoir* **22**: 35–44.
- Goloboff PA, Farris JS, Nixon KC. 2008.** TNT, a free program for phylogenetic analysis. *Cladistics* **24**: 774–786.
- Haeckel E. 1866.** *Generale Morphologie der Organismen. Band 2*. Berlin: 1–574.
- Hall J. 1862.** A new crustacean from the Potsdam Sandstone. *Canadian Naturalist* **7**: 443–445.
- van der Hammen L. 1963.** The addition of segments during the postembryonic ontogenesis of the Actinotrichida (Acarida) and its importance for the recognition of the primary subdivision of the body and the original segmentation. *Acarologia* **5**: 443–457.
- van der Hammen L. 1980.** *Glossary of acarological terminology, Vol. 1 General terminology*. The Hague: Dr. W. Junk, 1–245.
- van der Hammen L. 1986a.** Comparative studies in Chelicerata IV. Apatellata, Arachnida, Scorpionida, Xiphosura. *Zoologische Verhandlungen* **226**: 3–52.
- van der Hammen L. 1986b.** On some aspects of parallel evolution in Chelicerata. *Acta Biotheoretica* **35**: 15–37.
- Haug C, Van Roy P, Leipner A, Funch P, Rudkin DM, Schöllmann L, Haug JT. 2012a.** A holomorph approach to xiphosuran evolution – a case study on the ontogeny of *Euproops*. *Development Genes and Evolution* **222**: 253–268.
- Haug JT, Waloszek D, Maas A, Liu Y, Haug C. 2012b.** Functional morphology, ontogeny and evolution of mantis shrimp-like predators in the Cambrian. *Palaeontology* **55**: 369–399.
- Hendricks JR, Lieberman BS. 2008.** New phylogenetic insights into the Cambrian radiation of arachnomorph arthropods. *Journal of Paleontology* **82**: 585–594.
- Hesselbo SP. 1992.** Aglaspidida (Arthropoda) from the Upper Cambrian of Wisconsin. *Journal of Paleontology* **66**: 885–923.
- Heymons R. 1901.** Die Entwicklungsgeschichte der Scolopender. *Zoologica (Stuttgart)* **13**: 1–244.
- Hou X-G. 1987.** Three new large arthropods from Lower Cambrian Chengjiang, eastern Yunnan. *Acta Palaeontologica Sinica* **26**: 272–285.
- Hughes NC. 2003a.** Trilobite tagmosis and body patterning from morphological and developmental perspectives. *Integrative and Comparative Biology* **43**: 185–206.
- Hughes NC. 2003b.** Trilobite body patterning and the evolution of arthropod tagmosis. *Bioessays* **25**: 386–395.
- Jeram AJ. 1998.** Phylogeny, classification and evolution of Silurian and Devonian scorpions. In: Selden PA, ed. *Proceedings of the 17th European Colloquium of Arachnology, Edinburgh, 1997*. Burnham Beeches: The British Arachnological Society, 17–31.
- Kamenz C, Staude A, Dunlop JA. 2011.** Sperm carriers in Silurian sea scorpions. *Die Naturwissenschaften* **98**: 889–896.
- Krzemiński W, Krzemińska E, Wojciechowski D. 2010.** Silurian synziphosurine horseshoe crab *Pasternakia* revisited. *Acta Palaeontologica Polonica* **55**: 133–139.
- Kühl G, Briggs DEG, Rust J. 2009.** A great-appendage arthropod with a radial mouth from the Lower Devonian Hunsrück Slate, Germany. *Science* **323**: 771–773.
- Lamarck JBPA. 1801.** *Système des animaux sans vertèbres*. Paris: Lamarck and Deterville, 1–432.
- Lamsdell JC. 2011.** The eurypterid *Stoermeropterus conicus* from the lower Silurian of the Pentland Hills, Scotland. *Monograph of the Palaeontological Society, London* **165**: 1–84, pls 1–15.
- Lamsdell JC, Hoşgör İ, Selden PA. 2012.** A new Ordovician eurypterid (Arthropoda: Chelicerata) from Southeast Turkey: evidence for a cryptic Ordovician record of Eurypterida. *Gondwana Research*. doi: 10.1016/j.gr.2012.04.006.
- Lankester ER. 1881.** *Limulus* an arachnid. *Quarterly Journal of Microscopical Science* **21**: 504–548.
- Lankester ER. 1904.** The structure and classification of the Arthropoda. *Quarterly Journal of Microscopical Science* **47**: 523–582.
- Latreille PA. 1802.** *Histoire naturelle, générale et particulière, des Crustacés et des Insectes, vol. 3*. Paris: Dufart, 1–467.
- Latreille PA. 1810.** *Considérations générales sur l'Ordre Naturel des Animaux composant les Classes des Crustacés, des Arachnides et des Insectes*. Paris: 1–446.
- Laurie M. 1893.** The anatomy and relations of the Eurypteridæ. *Transactions of the Royal Society of Edinburgh* **37**: 509–528.
- Laurie M. 1899.** On a Silurian scorpion and some additional eurypterid remains from the Pentland Hills. *Transactions of the Royal Society of Edinburgh* **39**: 575–590.
- Lauterbach K-E. 1980.** Schlüsselereignisse in der Evolution des Grundplans der Arachnata (Arthropoda). *Abhandlungen des Naturwissenschaftlichen Vereins in Hamburg* **23**: 163–327.
- Lauterbach K-E. 1983.** Synapomorphien zwischen Trilobiten- und Cheliceratenzweig der Arachnata. *Zoologischer Anzeiger* **210**: 213–238.

- Lauterbach K-E. 1989.** Trilobites and phylogenetic systematics: a reply to G. Hahn. *Abhandlungen des Naturwissenschaftlichen Vereins in Hamburg* **28**: 201–211.
- Leach WE. 1819.** Entomostracés. In: Levrault FG, ed. *Dictionnaires des Sciences Naturelles, volume 14*. Paris: 524–543.
- Linnaeus C. 1758.** *Systema Naturae* **1**: 1–824.
- Liu Y, Hou X-G, Bergström J. 2007.** Chengjiang arthropod *Leanchoilia illecebrosa* (Hou, 1987) reconsidered. *GFF* **129**: 263–272.
- Lucas H. 1835.** Essai sur une monographie du genre Thelyphone. *Magasin de Zoologie* **8**: 17–24.
- Maddison WP, Maddison DR. 2010.** *Mesquite: a modular system for evolutionary analysis, Version 2.73*. Available at: <http://mesquiteproject.org>
- Minelli A, Fusco G, Hughes NC. 2003.** Tagmata and segment specification in trilobites. *Special Papers in Palaeontology* **70**: 31–43.
- Moore RA, Braddy SJ. 2005.** A glyptocystitid cystoid affinity for the putative stem group chelicerate (Arthropoda: Aglaspidida or Xiphosura) *Lemoneites* from the Ordovician of Texas, USA. *Lethaia* **38**: 293–296.
- Moore RA, Briggs DEG, Bartels C. 2005a.** A new specimen of *Weinbergina opitzi* (Chelicerata: Xiphosura) from the Lower Devonian Hunsrück Slate, Germany. *Paläontologische Zeitschrift* **79**: 399–408.
- Moore RA, Briggs DEG, Braddy SJ, Anderson LI, Mikulic DG, Kluessendorf J. 2005b.** A new synziphosurine (Chelicerata: Xiphosura) from the late Llandovery (Silurian) Waukesha lagerstätte, Wisconsin, USA. *Journal of Paleontology* **79**: 242–250.
- Moore RA, Briggs DEG, Braddy SJ, Shultz JW. 2011.** Synziphosurines (Xiphosura: Chelicerata) from the Silurian of Iowa. *Journal of Paleontology* **85**: 81–91.
- Moore RA, McKenzie SC, Lieberman BS. 2007.** A Carboniferous synziphosurine (Xiphosura) from the Bear Gulch Limestone, Montana, USA. *Palaeontology* **50**: 1013–1019.
- Müller OF. 1785.** *Entomstraca, seu, Insecta testacea quae in aquis Daniae et Norvegiae reperit, descripsit et iconibus illustravit*. Haunia: Thiele, 1–134.
- Nieszkowski J. 1859.** Zusätze zur Monographie der Trilobiten der Osteeprovinzen, nebst der Beschreibung einiger neuen obersilurischen Crustaceen. *Archive für Naturkunde, Liv-Estonia und Kurlands* **1**: 345–384.
- Novojilov NJ. 1959.** Mérostomes du Dévonien inférieur et moyen de Sibérie. *Annales de la Société Géologique du Nord* **78**: 241–258.
- O’Leary MA, Kaufman SG. 2012.** *MorphoBank 3.0: web application for morphological phylogenetics and taxonomy*. Available at: <http://www.morphobank.org>
- Orr PJ, Siveter DJ, Briggs DEG, Siveter DJ, Sutton MD. 2000.** A new arthropod from the Silurian Konservat-Lagerstätte of Herefordshire, UK. *Proceedings of the Royal Society of London* **267**: 1497–1504.
- Ortega-Hernández J, Legg DA, Braddy SJ. 2012.** The phylogeny of aglaspidid arthropods and the internal relationships within Artiopoda. *Cladistics*. doi: 10.1111/j.1096-0031.2012.00413.x.
- Packard AS. 1886.** On the Carboniferous xiphosurous fauna of North America. *Memoires of the National Academy of Sciences* **3**: 145–157.
- Pickett JW. 1993.** A Late Devonian xiphosuran from near Parkes, New South Wales. *Memoirs of the Association of Australian Palaeontologists* **15**: 279–287.
- Poschmann M, Anderson LI, Dunlop JA. 2005.** Chelicerate arthropods, including the oldest phalangiotarbid arachnid, from the early Devonian (Siegenian) of the Rhenish Massif, Germany. *Journal of Paleontology* **79**: 110–124.
- Raasch GO. 1939.** Cambrian Merostomata. *Special Papers of the Geological Society of America* **19**: 1–146.
- Ramsköld L, Edgecombe GD. 1991.** Trilobite monophyly revisited. *Historical Biology* **4**: 267–283.
- Raymond PE. 1944.** Late Paleozoic xiphosurans. *Bulletin of the Museum of Comparative Zoology* **94**: 475–508.
- Regier JC, Shultz JW, Zwick A, Hussey A, Ball B, Wetzer R, Martin JW, Cunningham CW. 2010.** Arthropod relationships revealed by phylogenomic analysis of nuclear protein-coding sequences. *Nature* **463**: 1079–1083.
- Richter R, Richter E. 1929.** *Weinbergina opitzi* n. g., n. sp., ein Schwerträger (Merost. Xiphos.) aus dem Devon (Rheinland). *Senckenbergiana* **11**: 21–39.
- Rominger C. 1887.** Description of primordial fossils from Mount Stephens, N. W. Territory of Canada. *Proceedings of the Academy of Natural Sciences of Philadelphia* **39**: 12–19.
- Rota-Stabelli O, Campbell L, Brinkmann H, Edgecombe GD, Longhorn SJ, Peterson KJ, Pisani D, Philippe H, Telford MJ. 2011.** A congruent solution to arthropod phylogeny: phylogenomics, microRNAs and morphology support monophyletic Mandibulata. *Proceedings of the Royal Society B* **278**: 298–306.
- Rudkin DM, Young GA, Nowlan GS. 2008.** The oldest horseshoe crab: a new xiphosurid from late Ordovician konservat-lagerstätten deposits, Manitoba, Canada. *Palaeontology* **51**: 1–9.
- Scholl G. 1977.** Beiträge zur Embryonalen entwicklung von *Limulus polyphemus* L. (Chelicerata, Xiphosura). *Zoomorphologie* **86**: 99–154.
- Scholtz G. 1995.** Head segmentation in Crustacea— an immunocytochemical study. *Zoology* **98**: 104–114.
- Scholtz G, Edgecombe GD. 2005.** Heads, Hox and the phylogenetic position of trilobites. In: Koenemann S, Jenner R, eds. *Crustacea and arthropod relationships*. Boca Raton: CRC, 139–165.
- Scholtz G, Edgecombe GD. 2006.** The evolution of arthropod heads: reconciling morphological, developmental and palaeontological evidence. *Development Genes and Evolution* **216**: 395–415.
- Schopf TJM. 1984.** Rates of evolution and the notion of ‘living fossils’. *Annual Review of Earth and Planetary Sciences* **12**: 245–292.
- Sekiguchi K, Yamamichi Y, Costlow JD. 1982.** Horseshoe crab developmental studies I. Normal embryonic development of *Limulus polyphemus* compared with *Tachypleus tridentatus*. In: Bonaventura J, Bonaventura C, Tesh S, eds.

- Physiology and biology of horseshoe crabs: studies on normal and environmentally stressed animals*. New York: Liss, 53–73.
- Selden PA. 1981.** Functional morphology of the prosoma of *Baltoerypteris tetragonophthalmus* (Fischer) (Chelicerata: Eurypterida). *Transactions of the Royal Society of Edinburgh: Earth Sciences* **72**: 9–48.
- Selden PA, Drygant DM. 1987.** A new Silurian xiphosuran from Podolia, Ukraine, USSR. *Palaeontology* **30**: 537–542.
- Selden PA, Siveter DJ. 1987.** The origin of the limuloids. *Lethaia* **20**: 383–392.
- Shultz JW. 1993.** Muscular anatomy of the giant whipscorpion *Mastigoproctus giganteus* (Lucas) (Arachnida: Uropygi) and its evolutionary significance. *Zoological Journal of the Linnean Society* **108**: 335–365.
- Shultz JW. 2001.** Gross muscular anatomy of *Limulus polyphemus* (Xiphosura, Chelicerata) and its bearing on evolution in the Arachnida. *Journal of Arachnology* **29**: 283–303.
- Shultz JW. 2007.** A phylogenetic analysis of the arachnid orders based on morphological characters. *Zoological Journal of the Linnean Society* **150**: 221–265.
- Simonetta AM. 1964.** Osservazioni sugli artropodi non trilobiti della ‘Burgess Shale’ (Cambriano medio). III Contributo. I generi *Molaria*, *Habelia*, *Emeraldella*, *Parahabelia*. (Nov.), *Emeraldoides* (Nov.). *Monitore Zoológico Italia* **72**: 215–231.
- Simonetta AM. 1970.** Studies on non-trilobite arthropods of the Burgess Shale (Middle Cambrian). *Palaeontographia Italica* **66**: 34–45.
- Simonetta AM, Delle Cave L. 1978.** Una possibile interpretazione filogenetica degli artropodi paleozoici. *Bollettino di Zoologia* **45**: 87–90.
- Siveter DJ, Selden PA. 1987.** A new, giant xiphosurid from the lower Namurian of Weardale, County Durham. *Proceedings of the Yorkshire Geological Society* **46**: 153–168.
- Siveter DJ, Sutton MD, Briggs DEG, Siveter DJ. 2004.** A Silurian sea spider. *Nature* **431**: 978–980.
- Snodgrass RE. 1952.** *Textbook of arthropod anatomy*. New York: Cornell University Press, 1–363.
- Stein M, Selden PA. 2012.** A restudy of the Burgess Shale (Cambrian) arthropod *Emeraldella brocki* and reassessment of its affinities. *Journal of Systematic Palaeontology* **10**: 361–383.
- Størmer L. 1934.** Merostomata from the Downtonian Sandstone of Ringerike, Norway. *Skrifter utgitt av Det Norske Videnskaps-Akademi i Oslo I. Matematisk-Naturvidenskapelig Klasse* **10**: 1–125, pls 1–12.
- Størmer L. 1936.** Eurypteriden aus dem Rheinischen Unterdevon. *Abhandlungen der Preussischen Geologischen Landesanstalt, Neue Folge* **175**: 1–74.
- Størmer L. 1944.** On the relationships and phylogeny of fossil and recent Arachnomorpha. *Skrifter utgitt av Det Norske Videnskaps-Akademi i Oslo. I. Matematisk-Naturvidenskapelig Klasse* **5**: 1–158.
- Størmer L. 1955.** Merostomata. In: Moore RC, ed. *Treatise on invertebrate paleontology part P. Arthropoda 2: chelicerata, pycnogonida and palaeoisopus*. Lawrence, KS: University of Kansas Press, 4–41.
- Størmer L. 1956.** A Lower Cambrian merostome from Sweden. *Arkiv för Zoologi, Serie 2* **9**: 507–514.
- Størmer L. 1969.** Eurypterids from the Lower Devonian of Willwerath, Eifel. *Senckenbergiana Lethaea* **50**: 21–35.
- Størmer L. 1972.** Arthropods from the Lower Devonian (Lower Emsian) of Alken an der Mosel, Germany. *Senckenbergiana Lethaea* **53**: 1–29.
- Størmer L, Waterston CD. 1968.** *Cyrtoctenus* gen. nov., a large late Palaeozoic arthropod with pectinate appendages. *Transactions of the Royal Society of Edinburgh* **68**: 63–101.
- Ström H. 1762.** Physik og Oeconomisk Beskrivelse over Fogderiet Søndmør, beliggende i Bergens. *Stift i Norge* **1**: 208–209.
- Stürmer W, Bergström J. 1981.** *Weinbergina*, a xiphosuran arthropod from the Devonian Hunsrück Slate. *Paläontologische Zeitschrift* **55**: 237–255.
- Sutton MD, Briggs DEG, Siveter DJ, Siveter DJ, Orr PJ. 2002.** The arthropod *Offacolus kingi* (Chelicerata) from the Silurian of Herefordshire, England: computer based morphological reconstructions and phylogenetic affinities. *Proceedings of the Royal Society of London B* **269**: 1195–1203.
- Tesakov AS, Alekseev AS. 1992.** Myriapod-like arthropods from the Lower Devonian of central Kazakhstan. *Paleontological Journal* **26**: 18–23.
- Tesakov AS, Alekseev AS. 1998.** *Maldybulakia* – new name for *Lophodesmus* Tesakov and Alekseev, 1992 (Arthropoda). *Paleontological Journal* **32**: 29.
- Tetlie OE, Braddy SJ. 2004.** The first Silurian chasmataspid, *Loganamaraspis dunlopi* gen. et sp. nov. (Chelicerata: Chasmataspidida) from Lesmahagow, Scotland, and its implications for eurypterid phylogeny. *Transactions of the Royal Society of Edinburgh: Earth Sciences* **94**: 227–234.
- Tetlie OE, Moore RA. 2004.** A new specimen of *Paleomerus hamiltoni* (Arthropoda; Arachnomorpha). *Transactions of the Royal Society of Edinburgh: Earth Sciences* **94**: 195–198.
- Van Roy P. 2006.** An aglaspidid arthropod from the Upper Ordovician of Morocco with remarks on the affinities and limitations of Aglaspidida. *Transactions of the Royal Society of Edinburgh: Earth Sciences* **96**: 327–350.
- Van Roy P, Orr PJ, Botting JP, Muir LA, Vinther J, Lefebvre B, el Hariri K, Briggs DEG. 2010.** Ordovician faunas of Burgess Shale type. *Nature* **465**: 215–218.
- Walcott CD. 1911.** Middle Cambrian Merostomata. Cambrian geology and paleontology II. *Smithsonian Miscellaneous Collections* **57**: 17–40.
- Walcott CD. 1912.** Middle Cambrian Branchiopoda, Malacostraca, Trilobita and Merostomata. Cambrian geology and paleontology II. *Smithsonian Miscellaneous Collections* **57**: 145–229.
- Waloszek D, Chen J, Maas A, Wang X. 2005.** Early Cambrian arthropods – new insights into arthropod head and structural evolution. *Arthropod Structure and Development* **34**: 189–205.
- Weygoldt P, Paulus HF. 1979.** Untersuchungen zur Morphologie, Taxonomie und Phylogenie der Chelicerata. *Zeitschrift für Zoologische Systematik und Evolutionsforschung* **17**: 85–116, 177–120.



- Whittington HB, Almond JE. 1987.** Appendages and habits of the Upper Ordovician trilobite *Triarthrus eatoni*. *Philosophical Transactions of the Royal Society B* **317**: 1–46.
- Wills MA. 1996.** Classification of the arthropod *Fuxianhuia*. *Science* **272**: 746–747.
- Wills MA, Briggs DEG, Fortey RA. 1994.** Disparity as an evolutionary index: a comparison of Cambrian and recent arthropods. *Paleobiology* **20**: 93–130.
- Wills MA, Briggs DEG, Fortey RA, Wilkinson M, Sneath PHA. 1998.** An arthropod phylogeny based on fossil and recent taxa. In: Edgecombe GD, ed. *Arthropod fossils and phylogeny*. New York: Columbia University Press, 33–105.
- Woodward H. 1864.** Descriptions of some new Palaeozoic Crustacea. *Geological Magazine* **1**: 196–200.
- Woodward H. 1865.** On a new genus of Eurypterida from the Lower Ludlow rocks of Leintwardine, Shropshire. *Quarterly Journal of the Geological Society* **21**: 490–492.
- Woodward H. 1866–1878.** A monograph of the British fossil Crustacea belonging to the order Merostomata. *Monograph of the Palaeontographical Society, London* **19, 22, 26, 32**: 1–263.
- Woodward H. 1867.** On some points in the structure of the Xiphosura, having reference to their relationship with the Eurypteridæ. *Quarterly Journal of the Geological Society* **23**: 28–40.
- Woodward H. 1868.** On a new limuloid crustacean (*Neolimulus falcatus*) from the Upper Silurian of Lesmahagow, Lanarkshire. *Geological Magazine* **5**: 1–3.
- Woodward H. 1872.** Notes on some British Palaeozoic Crustacea belonging to the order Merostomata. *Geological Magazine* **9**: 433–441.
- Woodward H. 1913.** The position of the Merostomata. *Geological Magazine* **10**: 293–300.
- von Zittel KA. 1885.** *Handbuch der Palaeontologie, Part 1. Palaeozoologie Vol. 2.* Munich and Leipzig: 1–893.

### SUPPORTING INFORMATION

Additional Supporting Information may be found in the online version of this article:

**Appendix S1.** Morphological character list and character matrix used in the phylogenetic analysis and the full strict consensus tree with branch support.
